1 **Single amino acid exchange in ACTIN2 confers increased tolerance to oxidative stress in**  
2 **Arabidopsis *der1-3* mutant**

3

4 Lenka Kuběnová<sup>1</sup>, Tomáš Takáč<sup>1</sup>, Jozef Šamaj<sup>1</sup>, Miroslav Ovečka<sup>1,\*</sup>

5

6 <sup>1</sup>Centre of the Region Haná for Biotechnological and Agricultural Research, Faculty of  
7 Science, Palacký University Olomouc, Šlechtitelů 27, 783 71 Olomouc, Czech Republic

8

9 \*Corresponding author:

10 Email: [miroslav.ovecka@upol.cz](mailto:miroslav.ovecka@upol.cz)

11 Tel: +420 585 634 734

12

13 Lenka Kuběnová (Vaškebová): [lenka.kubenova@upol.cz](mailto:lenka.kubenova@upol.cz), Tomáš Takáč:  
14 [tomas.takac@upol.cz](mailto:tomas.takac@upol.cz), Jozef Šamaj: [jozef.samaj@upol.cz](mailto:jozef.samaj@upol.cz)

15

16 Running title: Enhanced tolerance of *der1-3* mutant to oxidative stress

17

18 The date of submission: 16<sup>th</sup> of December, 2020

19

20 Total word count: 6893

21 Introduction word count: 1243

22 Materials and Methods word count: 1254

23 Results word count: 3824

24 Discussion word count: 1448

25 Acknowledgements word count: 26

26 Number of figures: 7

27 Figures published in colour: Figs. 1-7

28 Number of Supplementary Information:

29 Supplementary Figures: 9

30 Supplementary Tables: 0

31 Supplementary Videos: 6

32

33 **Highlight**

34 Topological position of one amino acid exchanged in the ACTIN2 protein structure in *der1-3*  
35 mutant enhanced tolerance to oxidative stress through increased capacity to decompose  
36 reactive oxygen species, lower bundling and enhanced dynamicity of the actin cytoskeleton.

37

38 **Abstract**

39 Single-point mutation in the *ACTIN2* gene of *der1-3* mutant revealed that ACTIN2 is an  
40 essential actin isoform required for root hair tip growth, and leads to shorter, thinner and  
41 more randomly oriented actin filaments in comparison to wild-type C24 genotype. Actin  
42 cytoskeleton has been linked to plant defence against oxidative stress, but it is not clear how  
43 altered structural organization and dynamics of actin filaments may help plants to cope with  
44 oxidative stress. In this study, we characterized seed germination, root growth, plant biomass,  
45 actin organization and antioxidant activity of *der1-3* mutant under oxidative stress induced by  
46 paraquat and H<sub>2</sub>O<sub>2</sub>. Under these conditions, plant growth was better in *der1-3* mutant, while  
47 actin cytoskeleton in *der1-3* carrying *pro35S::GFP:FABD2* construct showed lower bundling  
48 rate and higher dynamicity. Biochemical analyses documented lower degree of lipid  
49 peroxidation, elevated capacity to decompose superoxide and hydrogen peroxide. These  
50 results support the view that *der1-3* mutant is more resistant to oxidative stress. Single amino  
51 acid exchange in mutated ACTIN2 protein (Cys to Arg at the position 97) is topologically  
52 exposed to the protein surface and we propose that this might alter protein post-translational  
53 modifications and/or protein-protein interactions, leading to enhanced tolerance of *der1-3*  
54 mutant against oxidative stress.

55

56 **Keywords:** ACTIN2, actin cytoskeleton, antioxidant capacity, Arabidopsis, *der1-3* mutant,  
57 lipid peroxidation, oxidative stress, root hairs, single amino acid exchange

58

59 **Introduction**

60 Plants are continuously exposed to fluctuating environmental conditions, including  
61 adverse biotic and abiotic stressors. Oxidative stress, alone or in combination with other stress  
62 factors, may significantly disrupt normal cellular homeostasis in plants. Oxidative stress

63 significantly increases symplastic and apoplastic amount of reactive oxygen species (ROS)  
64 such as superoxide ( $O_2^{\bullet-}$ ), hydrogen peroxide ( $H_2O_2$ ), hydroxyl radical ( $OH^{\bullet}$ ) and singlet  
65 oxygen ( $^1O_2$ ). Although ROS serve also as signalling molecules, playing important roles in  
66 the regulation of numerous plant developmental processes (Mittler *et al.*, 2011; Baxter *et al.*,  
67 2014; Mhamdi and Van Breusegem, 2018), they are generated as toxic by-products of the  
68 aerobic metabolisms under stress conditions (Konig *et al.*, 2012; Foyer and Noctor, 2013;  
69 Vaahtera *et al.*, 2014; Mignolet-Spruyt *et al.*, 2016; Mittler *et al.*, 2017). In general,  
70 production of ROS with metabolic or stress-related origin, is controlled by components of  
71 redox signalling pathways. These maintain cellular ROS homeostasis, since both low and high  
72 ROS levels are undesirable for plant cells. Thus, an equilibrated threshold of ROS is  
73 maintained and controlled by the activity of antioxidant enzymes from the family of  
74 superoxide dismutases (SODs), catalases, peroxidases, glutathione peroxidases, iron  
75 uptake/storage regulating mechanisms, and a network of thio- and glutaredoxins  
76 (Vanderauwera *et al.*, 2011; Mittler, 2017).

77 Common approach inducing oxidative stress in plants experimentally is based on  
78 external application of paraquat (PQ, 1, 1'-dimethyl-4, 4'-bipyridinium chloride) and  
79 hydrogen peroxide ( $H_2O_2$ ). PQ, or methyl viologen, is widely used herbicide, which passes  
80 rapidly to the cells (Riley *et al.*, 1976; Hawkes, 2014). PQ is effective particularly in  
81 photosynthetically-active plant tissues (Krieger-Liszky *et al.*, 2011). Primary place of its activity  
82 is chloroplast, where PQ takes away electrons, probably from photosystem I and ferredoxin. This  
83 process leads to the formation of stable reduced cationic radical, reacting rapidly with molecular  
84 oxygen to form superoxides (Farrington *et al.*, 1973; Bus *et al.*, 1974). Superoxide anion  
85 interferes with antioxidant defence mechanisms leading to the damage of cells due to numerous  
86 chain reactions (Kunert and Dodge, 1989). Treatment of plants with PQ affects also gene  
87 expression. Alterations have been documented in the expression of numerous genes encoding  
88 different protein kinases (RLKs, MAPKs and CDPKs), antioxidant enzymes like ascorbate  
89 peroxidase, CuZn SOD (CSD), FeSOD (FSD), some transcription factors (MYB, MYC) or in  
90 genes securing cell structural integrity (Han *et al.*, 2014). All these changes likewise lead to  
91 significant oxidation of proteins or nucleic acids (Xiong *et al.*, 2007). Typical phenotypical  
92 reaction of affected plants is wilting and chlorosis. Prolonged PQ exposure causes browning of  
93 damaged tissues and severe chlorosis, leading to falling off the leaves (Hawkes, 2014).

94  $H_2O_2$  is generated in chloroplasts, mitochondria and peroxisomes as inevitable by-  
95 product of aerobic metabolism, or it is produced under stress conditions (both biotic and  
96 abiotic stress) (Maurino and Flügge, 2008). It is a relatively long-living molecule (up to 1 ms)

97 with the ability to pass membranes either by diffusion or actively via aquaporins (Levine *et*  
98 *al.*, 1994; Willekens *et al.*, 1997; Dat *et al.*, 2000; Miller *et al.*, 2010). The biological activity  
99 of H<sub>2</sub>O<sub>2</sub> is mediated by its ability to oxidize free SH groups (Dat *et al.*, 2000). Excessive  
100 exogenous H<sub>2</sub>O<sub>2</sub> application induces rapid cell death and necrosis of plant cells, even without  
101 passing through the apoptotic stage (O'Brien *et al.*, 1998; Yao *et al.*, 2001; Maurino and  
102 Flügge, 2008). External application of H<sub>2</sub>O<sub>2</sub> can stimulate some morphogenetic events in  
103 plants, like adventitious root initiation in flax hypocotyls (Takáč *et al.*, 2016). H<sub>2</sub>O<sub>2</sub>,  
104 particularly at higher concentrations, affects the expression pattern of genes involved in  
105 diverse plant defence responses. It can be exemplified by changing expression patterns of  
106 genes encoding biosynthetic enzymes of phenylpropanoids, lignin and salicylic acid (Douglas  
107 1996; Mauch-Mani and Slusarenko, 1996), as well as enzymes protective against oxidative  
108 stress, like glutathione S-transferase (GST; Pickett and Lu, 1989) and anthranilate synthase  
109 (ASA1), which is required for the biosynthesis of the phytoalexin camalexin (Desikan *et al.*,  
110 1998). Excessive formation of H<sub>2</sub>O<sub>2</sub> causes also oxidative impairments of photosynthetic  
111 apparatus (Park *et al.*, 1998; Rao and Davis, 1999; Dat *et al.*, 2000).

112 Actin filaments are essential cytoskeletal components, playing important roles in  
113 cellular (e.g. cytoplasmic streaming, organelle movement, vesicular trafficking) and  
114 developmental processes (e.g. establishment and maintenance of cell polarity and shape, cell  
115 division plane determination, tip growth). Typical feature of actin cytoskeleton is its ability to  
116 perform dynamic structural reorganizations (Wasteneys and Galway, 2003; Staiger and  
117 Blanchoin, 2006). The actin cytoskeleton is also involved in signalling events triggered by  
118 diverse external stimuli. Among others, actin cytoskeleton remodelling is part of abiotic stress  
119 response mechanisms in plants (Zhou *et al.*, 2010). Interestingly, dysfunctional ACTIN2  
120 isoform or destabilization of actin microfilaments using cytochalasin D alter localization of *A.*  
121 *thaliana* Respiratory burst oxidase homolog protein C (AtRbohC) during root hair  
122 development in *Arabidopsis* (Takeda *et al.*, 2008). Connection between intracellular  
123 distribution pattern of NDC1 (NAD(P)H dehydrogenases type II), able to reduce  
124 mitochondrial ROS production and ACTIN2 was also revealed (Wallström *et al.*, 2012).  
125 These data suggest a supporting role of actin filaments in the mediation of both short- and  
126 long-term plant responses to oxidative stress conditions. The dependence between changing  
127 dynamics of the actin cytoskeleton and elevated ROS level was described in *Arabidopsis* root  
128 tip cells under salt stress. Treatment with NADPH oxidase inhibitor diphenyleneiodonium  
129 prevented salt stress-induced ROS increase, but treatment with actin inhibitors latrunculin B  
130 or jasplakinolide caused enhanced ROS accumulation in salt stress-treated root cells (Liu *et*

131 *al.*, 2012). Actin microfilaments play an important role in vesicular trafficking, which is  
132 linking ROS signalling with auxin transport (Zwiewka *et al.*, 2019). In proposed model,  
133 oxidative stress caused by H<sub>2</sub>O<sub>2</sub> affects dynamics of actin cytoskeleton, which subsequently  
134 interferes with ARF-GEF-dependent trafficking of PIN2 from the plasma membrane to early  
135 endosomes (Zwiewka *et al.*, 2019). However, the complete mechanism linking structural and  
136 dynamic properties of actin cytoskeleton to oxidative stress in plants is not fully understood  
137 yet.

138 The actin cytoskeleton is essential for tip growth of root hairs. Indispensable functions  
139 of actin in growing root hairs were documented by pharmacological (Baluška *et al.*, 2000) and  
140 genetic (Gilliland *et al.*, 2002; Ringli *et al.*, 2002) means. Land-plant evolution brought a  
141 diversification into reproductive and vegetative classes of actin, later ones represented by  
142 ACT2, ACT7 and ACT8 (McDowell *et al.*, 1996; Meagher *et al.*, 1999). Genetic approaches  
143 using chemically-induced single-point mutation (Ringli *et al.*, 2002) or insertional knockout  
144 mutation (Gilliland *et al.*, 2002) revealed that ACT2 is essential for proper root hair tip  
145 growth. Taking into account that the expression level of ACT2 gene is not affected by the  
146 single point mutations in the DER1 locus and wild-type levels of ACT2 expression has been  
147 documented in the *der1* (*deformed root hairs1*) mutants (Ringli *et al.*, 2002), the palette of  
148 received mutants (*der1-1*, *der1-2*, *der1-3*) showed different degrees of the mutant root hair  
149 phenotype (Ringli *et al.*, 2002). It provides an opportunity to characterize involvement of  
150 single-point mutation in partially functional ACT2 protein in different aspects of plant  
151 development (Vaškebová *et al.*, 2018). In this study, we describe growth and developmental  
152 parameters of *der1-3* mutant, bearing strong ACT2 mutation phenotype (Ringli *et al.*, 2002),  
153 under oxidative stress caused by PQ and H<sub>2</sub>O<sub>2</sub>. In comparison to plants of wild-type (C24  
154 genotype), post-germination root growth, biomass production, antioxidant activity and  
155 prevention of lipid peroxidation were more effective in *der1-3* mutant. Considering lower  
156 bundling rate and higher dynamicity of the actin cytoskeleton, we conclude that *der1-3*  
157 mutant plants are more resistant to mild and severe oxidative stress induced by PQ or H<sub>2</sub>O<sub>2</sub> in  
158 the culture medium.

159

## 160 **Materials and methods**

161 *Plant material and cultivation in vitro*

162 Seeds of *Arabidopsis thaliana* (L.) Heynh., ecotype C24, *der1-3* mutant and transgenic lines  
163 expressing marker for visualization of the actin cytoskeleton were surface sterilized and  
164 planted into ½ Murasighe and Skoog medium without vitamins solidified with 0.6 % Gellan  
165 gum (Alfa Aesar, ThermoFisher). Seeds on medium in Petri dishes were stratified at 4°C for 3  
166 days for synchronized germination. After stratification, seeds on plates were cultivated *in*  
167 *vitro* vertically in culture chamber at 21°C, 70 % humidity, and 16/8h light/dark cycle.

168

#### 169 *Transgenic lines and transformation method*

170 Plants of *Arabidopsis thaliana* (L.) Heynh. ecotype C24 (Beemster *et al.*, 2002) and *der1-3*  
171 mutant (Ringli *et al.*, 2002) were transformed with *Agrobacterium tumefaciens* stain GV3101  
172 carrying a construct *pro35S::GFP:FABD2*, coding for F-actin binding domain 2 of  
173 *Arabidopsis* FIMBRIN 1 (FABD2) fused to green fluorescent protein (GFP; Voigt *et al.*,  
174 2005). These lines were used for fluorescent visualization of actin filaments (Vaškebová *et*  
175 *al.*, 2018). Briefly, this construct was prepared in pCB302 vector with rifampicin and  
176 kanamycin resistance by classical cloning method with herbicide phosphinothricin as the  
177 selection marker *in planta*. Stable transformation was used according to Clough and Bent  
178 (1998). Plants (3-4 weeks old) were soaked in *Agrobacterium tumefaciens* cultures for 10  
179 seconds and were stabilized in dark overnight. After that, plants were cultivated in culture  
180 chamber at 24°C, 60 % humidity, 16/8h light/dark photoperiod. Transformation was repeated  
181 after one week. Seeds of T<sub>1</sub> generation were planted for selection on ½ MS media with  
182 phosphinothricin (50 mg.ml<sup>-1</sup>). Transgenic plants were selected for the presence of GFP  
183 fusion proteins using epifluorescence zoom microscope Axio Zoom.V16 (Carl Zeiss,  
184 Germany). For further experiments, seeds of T<sub>3</sub> generation were used.

185

#### 186 *Application of stress factors*

187 Oxidative stress was induced by adding of three different concentrations of paraquat (PQ; 0.1;  
188 0.2 and 0.5 µmol.l<sup>-1</sup>), and four different concentrations of H<sub>2</sub>O<sub>2</sub> (0.5; 1; 1.5 and 3 mmol.l<sup>-1</sup>) to  
189 culture medium. Seeds were planted either directly on ½ MS media containing different  
190 concentrations of PQ, or 3 days old plants germinated on control media were transferred to  
191 media containing different concentrations of PQ or H<sub>2</sub>O<sub>2</sub>.

192

193 *Phenotypical analysis*

194 Plants germinating on control media growing *in vitro* were scanned directly on plates every  
195 24 hours for 11 days from the day of germination. Plants germinating on control media and  
196 transferred to stress conditions were scanned on plates every 24 hours for additional 4 days  
197 after their transfer. Images from the scanner (Image Scanner III, GE Healthcare, Chicago, IL,  
198 USA) were used for measurement of the primary root length. Images documenting phenotype  
199 of plants growing in plates were prepared with Nikon 7000 camera equipped with macro-  
200 objective Sigma 50 mm (2.8 focal distance) in time points indicated in the corresponding  
201 figure captions. Fresh weights of separated shoots and roots were measured from 18 days old  
202 plants growing on media containing PQ.

203

204 *Sample preparation and microscopic analysis*

205 Samples for microscopic analysis were prepared in microscopic chambers filled with liquid  
206 culture medium according to Ovečka *et al.* (2005). Oxidative stress was induced using liquid  
207 culture medium containing  $0.1 \mu\text{mol.l}^{-1}$  of PQ. Samples were firstly observed under the  
208 microscope in control medium for 30 min and then medium containing PQ was applied using  
209 perfusion of microscopic chamber. Total volume of the medium applied was 100  $\mu\text{l}$ , added by  
210 perfusion sequentially 10 times with 10  $\mu\text{l}$ . After perfusion, plants were carefully covered  
211 with parafilm and samples were scanned in the microscope every 30 s for further 30 min. Live  
212 cell imaging of actin cytoskeleton in hypocotyl epidermal cells of C24 ecotype and *der1-3*  
213 mutant expressing a construct *pro35S::GFP:FABD2* was performed in a fast scanning mode  
214 using spinning disk microscope Cell Observer SD Axio Observer Z1 (Carl Zeiss, Germany),  
215 equipped with EC Plan-Neofluar 40 $\times$ /1.3 NA oil immersion objective (Carl Zeiss, Germany)  
216 and Plan-Apochromat 63 $\times$ /1.4 NA oil immersion objective (Carl Zeiss, Germany). Samples  
217 were imaged with excitation laser line 488 nm and emission filter BP525/50. Laser power was  
218 set up not to exceed 50% of the laser intensity range available. Samples were scanned in a Z-  
219 stack mode in a time range of every 30 seconds for 30 min. Images were acquired with the  
220 Evolve 512 EM CCD camera with the exposure time 500-750 ms per optical section.  
221 Orthogonal projections of 6 to 10 optical sections from Z-stacks were used for preparation of  
222 videos and measurement of actin filament skewness and occupancy. Semiquantitative analysis  
223 of actin filament dynamics in hypocotyl epidermal cells was presented by pseudocolouring  
224 displacement analysis. Images were acquired at the beginning, after 15 min and after 30 min

225 of time-point scanning, individually coloured red, green, and blue, respectively, and merged.  
226 Overlay of all three colours creating a white one indicated lowering, or eventually stopping,  
227 of the actin dynamic activity.

228

#### 229 *Histochemical detection of $O_2^{\bullet-}$ and $H_2O_2$ production*

230 Plants (3 days old) were transferred from control media to media containing  $0.1 \mu\text{mol.l}^{-1}$  PQ  
231 and  $3 \text{ mmol.l}^{-1}$   $H_2O_2$  and histochemical detection of ROS was done 11 days after the transfer  
232 (plants were 14 days old). Superoxide ( $O_2^{\bullet-}$ ) was detected by NBT (nitrotetrazolium blue)  
233 staining according Ramel *et al.* (2009).  $H_2O_2$  detection was done with DAB  
234 (diaminobenzidine) staining according Daudi *et al.* (2012). Plants after staining were mounted  
235 and imaged in Axio Zoom.V16 (Carl Zeiss, Germany). Staining intensity mean values in  
236 cotyledons and leaves were measured and quantified in ZEN 2 (blue edition; Carl Zeiss,  
237 Germany) software.

238

#### 239 *Analysis of enzymatic activity and immunoblotting*

240 For superoxide dismutase (SOD) activity examination, proteins were extracted using Na-  
241 phosphate extraction buffer containing 50 mM Na-phosphate buffer (pH 7.8), 2 mM EDTA, 2  
242 mM ascorbic acid and 10% (v/v) glycerol. SOD activities were visualised on native PAGE  
243 gels as described by Takáč *et al.* (2014). For immunoblotting, the enzyme extracts were  
244 enriched with 4x Laemmli SDS buffer (to reach final concentration of 10% v/v glycerol, 60  
245 mM Tris/HCl pH 6.8, 2% w/v SDS, 0.002% w/v bromophenol blue and 5% v/v  $\beta$ -  
246 mercaptoethanol). Afterwards, the samples were boiled at  $95^\circ\text{C}$  for 5 min. Equal amounts of  
247 proteins (15  $\mu\text{g}$ ) were loaded on 10% SDS PAGE gels. Immunoblotting analysis and  
248 chemiluminescence signal development were carried out according to Takáč *et al.* (2017). As  
249 a primary antibodies, anti-CSD2 and anti-PrxQ (peroxiredoxin Q; both from Agrisera,  
250 Vännäs, Sweden) were used diluted 1:3000 and 1:1000 respectively, in Tris-buffered saline  
251 containing 0,1% Tween-20. The band optical densities were quantified using Image J.  
252 Analyses were performed in three biological replicates.

253

#### 254 *TBARS assay*



255 Lipid peroxidation was assayed using the TBARS (thiobarbituric acid reactive substances)  
256 assay as described in Larkindale and Knight (2002).

257

### 258 *Modelling of ACTIN2 protein structure*

259 Samples of gDNA from *der1-3* mutant plants (from three different samples) were isolated  
260 using a phenol/chloroform/isoamylalcohol protocol (Pallotta *et al.*, 2000). Isolated gDNA  
261 samples were subjected to sequencing (SeqMe, Czech Republic). Acquired sequences were  
262 compared with control *ACTIN2* gDNA sequence in Nucleotide BLAST database  
263 ([https://blast.ncbi.nlm.nih.gov/Blast.cgi?PROGRAM=blastn&PAGE\\_TYPE=BlastSearch&LI](https://blast.ncbi.nlm.nih.gov/Blast.cgi?PROGRAM=blastn&PAGE_TYPE=BlastSearch&LINK_LOC=blasthome)  
264 [NK\\_LOC=blasthome](https://blast.ncbi.nlm.nih.gov/Blast.cgi?PROGRAM=blastn&PAGE_TYPE=BlastSearch&LINK_LOC=blasthome)). Sequences (both control and mutated) were translated to protein  
265 sequences in application  
266 [http://bio.lundberg.gu.se/edu/translat.html?fbclid=IwAR3var5FJ8CB14QqNe4Yic8NVz0TvW](http://bio.lundberg.gu.se/edu/translat.html?fbclid=IwAR3var5FJ8CB14QqNe4Yic8NVz0TvWRd0TrF-uGUo6Nk6idLQxy2HvQqPEU)  
267 [Rd0TrF-uGUo6Nk6idLQxy2HvQqPEU](http://bio.lundberg.gu.se/edu/translat.html?fbclid=IwAR3var5FJ8CB14QqNe4Yic8NVz0TvWRd0TrF-uGUo6Nk6idLQxy2HvQqPEU). Only one single point mutation found (1114 C-T)  
268 changed protein sequence (Arg97-Cys97) accordingly. Protein sequences were used for  
269 protein structure modelling using application  
270 [https://swissmodel.expasy.org/interactive?fbclid=IwAR1V9lhUgjiR1kUlWFLd8ojFftkHpkZw](https://swissmodel.expasy.org/interactive?fbclid=IwAR1V9lhUgjiR1kUlWFLd8ojFftkHpkZwxIoT6mnEVIulEC2cPSYQov2twoE)  
271 [xIoT6mnEVIulEC2cPSYQov2twoE](https://swissmodel.expasy.org/interactive?fbclid=IwAR1V9lhUgjiR1kUlWFLd8ojFftkHpkZwxIoT6mnEVIulEC2cPSYQov2twoE). The same application was used also for generation and  
272 downloading of representative images and videos.

273

### 274 *Data acquisition and analysis*

275 Evaluated parameters such as root growth, skewness (representing an extent of actin filament  
276 bundling) and actin filament fluorescence integrated density (representing a percentage of  
277 occupancy) were measured in ImageJ (<http://rsb.info.nih.gov/ij/>). Graphs were prepared in  
278 Microsoft Excel program. Statistical significance between treatments at  $p < 0.05$  was done  
279 using t-Test in Microsoft Excel or in program STATISTICA 12 (StatSoft) by ANOVA and  
280 subsequent Fisher's LSD test ( $p < 0,05$ ).

281

## 282 **Results**

### 283 *Impact of the der1-3 mutation and its topology on protein tertiary structure*

284 *Arabidopsis thaliana* mutant *der1-3* (*deformed root hair1*) has been produced in the  
285 C24 ecotype background by an ethylmethanesulfonic acid - induced mutagenesis in the *DER1*  
286 locus, leading to a single-point mutation in the *ACTIN2* gene (Ringli *et al.*, 2002). Mutants  
287 were selected according to a disturbed root hair development phenotype (Ringli *et al.*, 2002,  
288 2005). Single-point mutation in the gDNA sequence was determined at the position 1114  
289 (changing cytosine to thymine), leading to altered protein sequence exchanging Arg97 to  
290 Cys97 in *der1-3* mutant (Ringli *et al.*, 2002). We translated a nucleotide sequence, both in  
291 natural and mutated variant, to a primary protein sequence and we created a model of tertiary  
292 protein structure. We found that this position, both in natural (Fig. 1A) and mutated (Fig. 1B)  
293 ACTIN2 protein is placed in a loop located at the protein periphery (Suppl. Videos 1, 2).  
294 Importantly, the mutation does not alter the overall tertiary structure of protein (Fig. 1A, B),  
295 while this single amino acid exchange is topologically exposed to the protein surface (Fig. 1C,  
296 D). This analysis indicates that the ACTIN2 protein is produced in *der1-3* mutant and this  
297 single-point mutation exchanging Arg to Cys at the position 97 might rather influence its  
298 oxidation state, other protein post-translational modifications and/or protein-protein  
299 interactions.

300

### 301 *Efficiency of seed germination under oxidative stress*

302 In order to characterize responses of *der1-3* mutant to oxidative stress, we analysed  
303 several phenotypical parameters. Apart of obvious phenotype of root hairs that are arrested in  
304 tip growth after bulge formation (Ringli *et al.*, 2002), mutant plants are affected in more  
305 developmental aspects. Among them, seeds of *der1-3* mutant germinate later than C24 wild-  
306 type seeds, and primary roots show more irregular and wavy growth pattern, due to a change  
307 in the cell division plane orientation (Vaškebová *et al.*, 2018). Thus, our first interest was to  
308 test the rate of seed germination under conditions of mild and severe oxidative stress. Dry  
309 seeds of C24 and *der1-3* mutant after surface-sterilization and imbibition were tested for  
310 germination on solidified culture media with different concentrations of PQ. Germination  
311 efficiency of *der1-3* mutant seeds was lower than of C24 seeds under control conditions  
312 (Vaškebová *et al.*, 2018), which was corroborated also in this study (Suppl. Fig. S1A).  
313 Treatment with three different concentrations of PQ (0.1, 0.2 and 0.5  $\mu\text{mol.l}^{-1}$ ) did not  
314 influence considerably the rate of seed germination (Suppl. Fig. S1B-D). Thus, seed

315 germination of *der1-3* was synchronously delayed comparing to C24 under PQ treatment  
316 (Suppl. Fig. S1B-D), similarly as in control conditions (Suppl. Fig. S1A).

317 The structure of actin cytoskeleton in cells of *der1-3* mutant was also compromised,  
318 showing thinner and less organized actin microfilaments in comparison to C24 control plants  
319 (Vaškebová *et al.*, 2018). Based on this fact, we performed phenotypical analyses on  
320 transgenic C24 and *der1-3* mutant lines carrying a construct *pro35S::GFP:FABD2*,  
321 representing genetically-encoded marker for live cell imaging of actin cytoskeleton. Seed  
322 germination analysis revealed similar delay of germination efficiency in transgenic *der1-3*  
323 mutant line as compared to C24 transgenic line in both control conditions (Suppl. Fig. S1E)  
324 and after treatment with 0.1, 0.2 and 0.5  $\mu\text{mol.l}^{-1}$  PQ (Suppl. Figs. S1F-H). Seed germination  
325 rate of transgenic C24 line carrying *pro35S::GFP:FABD2* (designated as C24 GFP-FABD2)  
326 and transgenic *der1-3* mutant line carrying *pro35S::GFP:FABD2* (designated as *der1-3* GFP-  
327 FABD2) within the first 24 h did not significantly differ from germination rate of C24 wild-  
328 type or *der1-3* mutant seeds, respectively, in control conditions (Suppl. Fig. S1I), as well as  
329 after treatment with 0.1, 0.2 and 0.5  $\mu\text{mol.l}^{-1}$  PQ (Suppl. Fig. S1J-L). This experiment clearly  
330 showed that: I. seed germination is significantly delayed in *der1-3* mutant, II. expression of  
331 *pro35S::GFP:FABD2* construct in transgenic C24 and *der1-3* mutant lines did not affect the  
332 germination efficiency, and III. oxidative stress induced by PQ application did not affect  
333 considerably the physiological processes related to seed germination in both C24 and *der1-3*  
334 mutant.

335

### 336 *Influence of oxidative stress on post-germination root growth*

337 Analysis of primary root growth of seedlings within the first 5 days after germination  
338 on control media revealed slightly lower elongation rate of *der1-3* roots in comparison to C24  
339 (Fig. 2A), however, the differences in average root growth per 24 h were insignificant (Fig.  
340 2I). We found the same root growth rate also in *der1-3* GFP-FABD2 line (Fig. 2I), but  
341 interestingly, average root growth rate per 24 h of C24 GFP-FABD2 line on control media  
342 was significantly higher (Fig. 2E, I). Thus, seedlings of transgenic C24 GFP-FABD2 line  
343 showed more effective root growth rate than C24 wild-type seedlings (Suppl. Fig. S2A),  
344 while there were no differences in this parameter between seedlings of *der1-3* and transgenic  
345 *der1-3* GFP-FABD2 line in control conditions (Suppl. Fig. S2B).

346 Seedlings of all tested lines germinating and growing on PQ-containing media within  
347 the first 5 days after germination showed reduction in primary root growth, which was  
348 dependent on PQ concentration (Suppl. Fig. S2C-F). Together with flattening of the root  
349 growth rate curves, there was also apparent PQ dose-dependent unification of the root growth  
350 rate between C24 wild-type and *der1-3* mutant seedlings (Fig. 2B-D), and also between C24  
351 GFP-FABD2 and *der1-3* GFP-FABD2 seedlings (Fig. 2F-H). Dose-dependent reduction in  
352 average root growth per 24 h was apparent in seedlings germinating and growing on media  
353 containing 0.1, 0.2 and 0.5  $\mu\text{mol.l}^{-1}$  PQ (Fig. 2J-L; Suppl. Fig. S2C-F). Although the root  
354 growth rate of *der1-3* mutant was always similar or lower in comparison to C24 wild-type  
355 under control conditions (Fig. 2A, I; Suppl. Fig. S2A, B), roots of *der1-3* mutant germinating  
356 and growing in the presence of 0.1  $\mu\text{mol.l}^{-1}$  PQ showed better growth than C24 wild-type  
357 (Fig. 2J). Average root growth rate per 24 h was considerably reduced on media containing  
358 0.2 and 0.5  $\mu\text{mol.l}^{-1}$  PQ (Fig. 2K, L) without any differences among all tested lines. However,  
359 when differences were evaluated as reduction ratio in respect to control values, fold change in  
360 averaged root growth rate on media containing 0.1  $\mu\text{mol.l}^{-1}$  PQ was 4.4 and 5.0 in C24 wild-  
361 type and C24 GFP-FABD2, respectively, but only 2.9 and 3.1 in *der1-3* mutant and *der1-3*  
362 GFP-FABD2, respectively (Fig. 2M). Although fold change in averaged root growth rate  
363 between C24 and *der1-3* mutant genotypes were less obvious on media containing 0.2 and 0.5  
364  $\mu\text{mol.l}^{-1}$  PQ, the reduction rate was similar or slightly lower in *der1-3* mutant (Fig. 2N, O).  
365 These data clearly indicate that root growth of both *der1-3* mutant and *der1-3* GFP-FABD2  
366 transgenic line is less affected by mild and severe oxidative stress induced by PQ presence in  
367 the culture medium.

368 Effectivity of the root growth rate under oxidative stress in analysed lines was  
369 determined also by measurement of the distance between the first root hair and the root tip. In  
370 roots of 5 days-old plants growing in control conditions, this distance was significantly longer  
371 in C24 wild-type in comparison to *der1-3* (Suppl. Fig. S3A). The same tendency showing  
372 significantly longer distance between the first root hair and the root tip was observed also in  
373 transgenic C24 GFP-FABD2 line in comparison to transgenic *der1-3* GFP-FABD2 line  
374 (Suppl. Fig. S3A). Interestingly, both transgenic lines (C24 GFP-FABD2 and *der1-3* GFP-  
375 FABD2) had this measured distance significantly longer in comparison to control C24 and  
376 *der1-3* plants, respectively (Suppl. Fig. S3A). Such differences between C24 and *der1-3*  
377 mutant were reduced considerably or disappeared completely in seedlings germinating and  
378 growing on media containing 0.1, 0.2 and 0.5  $\mu\text{mol.l}^{-1}$  PQ (Suppl. Figs. S3B-D). This

379 represented another indication of differential responses to oxidative stress of analysed lines,  
380 showing significantly higher tolerance of transgenic *der1-3* mutant lines.

381 Plants monitored for 11 days after germination showed apparent time-dependent  
382 acceleration of root growth in control conditions (Suppl. Fig. S4A) with no obvious  
383 differences between C24 wild-type and *der1-3* mutant (Suppl. Fig. S4E). However, root  
384 growth of C24 GFP-FABD2 line was faster, particularly in later stages of development  
385 (Suppl. Fig. S4A), leading to significant increase of average root growth per 24 h (Suppl. Fig.  
386 S4E). Monitoring root growth rate upon prolonged PQ treatment showed clearly different  
387 trend of response between control C24 lines and *der1-3* mutant lines. On media containing 0.1  
388 and 0.2  $\mu\text{mol.l}^{-1}$  PQ, both *der1-3* mutant and *der1-3* GFP-FABD2 line showed better average  
389 root growth per 24 h as C24 wild-type and C24 GFP-FABD2 line (Suppl. Fig. S4F, G).  
390 Continuous monitoring of root growth rate revealed that it was higher in *der1-3* mutant and  
391 *der1-3* GFP-FABD2 line than in C24 wild-type and C24 GFP-FABD2 line from 8<sup>th</sup> to 11<sup>th</sup>  
392 day after germination (Suppl. Fig. S4B, C), and it was opposite to control conditions (Suppl.  
393 Fig. S4A). Root growth of plants on media containing 0.5  $\mu\text{mol.l}^{-1}$  PQ was considerably  
394 reduced with minimal increase in length per day (Suppl. Fig. S4D), showing very similar  
395 average root growth per 24 h in all examined lines (Suppl. Fig. S4H). This analysis confirmed  
396 that, unlike the wild-type lines, root growth and development of *der1-3* mutant and *der1-3*  
397 GFP-FABD2 line is better adapted to the mild oxidative stress.

398

#### 399 *Biomass production affected by oxidative stress*

400 Shoot and root fresh weights analysed 18 days after germination of plants growing on  
401 control media revealed considerably higher biomass production in C24 wild-type and C24  
402 GFP-FABD2 line. Oppositely, shoot and root biomass productions in *der1-3* mutant and *der1-3*  
403 GFP-FABD2 line were seemingly lower (Suppl. Fig. S5A). In plants germinating and 18  
404 days growing on media containing PQ both shoot and root biomass production declined, but  
405 not uniformly among tested lines. While plants of C24 wild-type and C24 GFP-FABD2 line  
406 reacted to increasing concentrations of PQ by drastic reduction of both shoot and root  
407 biomass, it was not so dramatically reduced in *der1-3* mutant and *der1-3* GFP-FABD2 line.  
408 Already on media containing 0.1 and 0.2  $\mu\text{mol.l}^{-1}$  PQ (Suppl. Figs. S5B, C) biomass weights  
409 of *der1-3* mutant and *der1-3* GFP-FABD2 line were similar or even higher as in C24 wild-  
410 type and C24 GFP-FABD2 line. Media with 0.5  $\mu\text{mol.l}^{-1}$  PQ hindered massively root

411 development, but shoot biomass production and development was clearly better in *der1-3*  
412 mutant and *der1-3* GFP-FABD2 line (Suppl. Fig. S5D). Calculation of the biomass  
413 production as a reduction ratio in fold change in respect to control revealed minimal change in  
414 both shoot and root biomass in *der1-3* mutant and *der1-3* GFP-FABD2 line on media  
415 containing 0.1  $\mu\text{mol.l}^{-1}$  PQ in comparison to C24 wild-type and C24 GFP-FABD2 line (Suppl.  
416 Fig. S5E). On media containing 0.2 and 0.5  $\mu\text{mol.l}^{-1}$  PQ (Suppl. Figs. S5F, G), we found  
417 higher biomass production (in fold change) in *der1-3* mutant and *der1-3* GFP-FABD2 line  
418 when compared to C24 wild-type and C24 GFP-FABD2 line. This analysis clearly revealed  
419 physiological resistance of *der1-3* mutant against mild and severe oxidative stress.

420

#### 421 *Post-germination plant responses to oxidative stress*

422 The process of seed germination in all tested lines was not considerably affected by  
423 oxidative stress induced by PQ presence in the culture medium (Suppl. Fig. S1). In order to  
424 characterize solely oxidative stress-related inhibition of root growth, we performed seed  
425 germination on control media and after that we transferred 3 days-old seedlings to culture  
426 media containing different concentrations of PQ. Comparison of root growth rate within 4  
427 days after transfer showed that it is very similar for C24 wild-type and *der1-3* mutant on  
428 control media (Fig. 3A, I). After transfer of seedlings of transgenic lines, root growth rate on  
429 control media of C24 GFP-FABD2 line was significantly higher in comparison to *der1-3*  
430 GFP-FABD2 line (Fig. 3E). Actually, it was the highest among all tested lines (Fig. 3I). Root  
431 growth rate of C24 GFP-FABD2 line was higher as in C24 wild-type (Suppl. Fig. S6A), while  
432 there was no difference between *der1-3* mutant and *der1-3* GFP-FABD2 line (Suppl. Fig.  
433 S6B). Transfer of C24 wild-type and *der1-3* mutant seedlings germinated on control media to  
434 media containing 0.1, 0.2 and 0.5  $\mu\text{mol.l}^{-1}$  PQ led to similarly decreased root growth rate (Fig.  
435 3B, C, D). We found similar reaction also in seedlings of C24 GFP-FABD2 and *der1-3* GFP-  
436 FABD2 lines germinated on control media and transferred to media containing the same  
437 concentrations of PQ (Fig. 3F, G, H). Although the absolute root length of *der1-3* mutant and  
438 *der1-3* GFP-FABD2 line was lower on media containing 0.2 and 0.5  $\mu\text{mol.l}^{-1}$  PQ (Fig. 3C, D,  
439 G, H), the averaged root growth rate was not considerably different (Fig. 3K, L). However,  
440 the reaction of seedlings to 0.1  $\mu\text{mol.l}^{-1}$  PQ revealed much better tolerance of *der1-3* mutant  
441 and *der1-3* GFP-FABD2 line, as their averaged root growth rate was significantly higher than  
442 in C24 wild-type and C24 GFP-FABD2 line, respectively (Fig. 3J). Different mode of

443 seedling reaction after transfer to media with  $0.1 \mu\text{mol.l}^{-1}$  PQ was revealed. There was rather  
444 uniform reduction of the root growth rate on PQ-containing media in C24 wild-type and C24  
445 GFP-FABD2 line (Suppl. Fig. S6C, D), while root growth rate much less affected by  $0.1$   
446  $\mu\text{mol.l}^{-1}$  PQ was clearly documented in *der1-3* mutant and *der1-3* GFP-FABD2 line (Suppl.  
447 Fig. S6E, F). These observations were corroborated by quantitative characterization of  
448 differences in averaged root growth rate by reduction ratio between control and PQ-  
449 containing media in fold changes. Root growth reduction ratio caused by  $0.1 \mu\text{mol.l}^{-1}$  PQ was  
450 lower in seedlings of *der1-3* mutant and *der1-3* GFP-FABD2 line (Fig. 3M). Using  $0.2$   
451  $\mu\text{mol.l}^{-1}$  PQ, the differences between C24-related and *der1-3* mutant-related lines were lower  
452 in *der1-3* GFP-FABD2 line, while the reduction was stronger in *der1-3* mutant than in the  
453 C24 wild-type (Fig. 3N). Differences between lines transferred to  $0.5 \mu\text{mol.l}^{-1}$  PQ were  
454 negligible (Fig. 3O).

455 Phenotype of plants germinated and grown on control media for 20 days confirmed  
456 smaller above ground parts and more irregular and wavy root growth pattern of *der1-3* mutant  
457 (Suppl. Fig. S7A), in comparison to C24 wild-type (Suppl. Fig. S7B). Transgenic plants of  
458 C24 GFP-FABD2 and *der1-3* GFP-FABD2 grown on control media were bigger, but similar  
459 phenotypes, namely smaller above ground parts and more irregular and wavy root growth  
460 pattern of *der1-3* GFP-FABD2 line, were still apparent (Suppl. Fig. S7C, D). However, plants  
461 transferred from control to PQ-containing culture media revealed better development of *der1-*  
462 *3* mutant in comparison to C24 wild-type (Fig. 4A, B, C) and *der1-3* GFP-FABD2 line in  
463 comparison to C24 GFP-FABD2 line (Fig. 4D, E, F). In all concentrations of PQ tested, the  
464 above ground parts of *der1-3* mutant and *der1-3* GFP-FABD2 plants were much better  
465 developed (Fig. 4). In addition, considering purple pigmentation and arrested leaf  
466 enlargement, plants of *der1-3* mutant and *der1-3* GFP-FABD2 were much less affected in  
467 media containing  $0.2 \mu\text{mol.l}^{-1}$  PQ (Fig. 4B, E) and  $0.5 \mu\text{mol.l}^{-1}$  PQ (Fig. 4C, F). In media  
468 containing  $0.1 \mu\text{mol.l}^{-1}$  PQ, plants of *der1-3* mutant and *der1-3* GFP-FABD2 line did not  
469 show such strong stress reaction and developmental arrest (Fig. 4A, D). Root development  
470 tested at the same conditions showed clear genotype-dependent response to PQ-induced  
471 oxidative stress. Plants (3 days-old) transferred from control to PQ-containing plates and  
472 photographed 17 days after transfer showed that *der1-3* mutant and *der1-3* GFP-FABD2 line,  
473 are much less sensitive to  $0.1 \mu\text{mol.l}^{-1}$  PQ than C24 wild-type and C24 GFP-FABD2 line,  
474 respectively (Fig. 4A, D). Root system of *der1-3* mutant (Fig. 4A) and *der1-3* GFP-FABD2  
475 line (Fig. 4D) maintained ability to grow and develop. Although  $0.2 \mu\text{mol.l}^{-1}$  PQ considerably

476 reduced root development, growing and branching capacity of *der1-3* mutant (Fig. 4B) and  
477 *der1-3* GFP-FABD2 line (Fig. 4E) were higher in comparison to C24 wild-type and C24  
478 GFP-FABD2 line. Addition of 0.5  $\mu\text{mol.l}^{-1}$  PQ to the culture medium reduced dramatically  
479 root development of all tested lines (Fig. 4C, F), which was apparent also from root growth  
480 rate (Fig. 3L) and root fresh weight (Suppl. Fig. S5D) analyses. Putting together, analyses of  
481 post-germination root growth and plant development after transfer to PQ-containing media  
482 from control conditions confirmed that plants of *der1-3* mutant and *der1-3* GFP-FABD2 line  
483 are more tolerant, particularly to the mild oxidative stress.

484 Taking into account the inhibitory effects of PQ in photosynthetically-active plant  
485 tissues, we employed also  $\text{H}_2\text{O}_2$  treatment, as an alternative oxidative stress-inducing agent  
486 that directly affects the root system and its development. Four different concentrations of  
487  $\text{H}_2\text{O}_2$  (0.5; 1; 1.5 and 3  $\text{mmol.l}^{-1}$ ) were tested in post-germination root growth rate analysis  
488 within 4 days after transfer of 3 days-old seedlings germinated on control media. We  
489 observed  $\text{H}_2\text{O}_2$  dose-dependent response in the inhibition of root elongation (Fig. 5A-D).  
490 Averaged root length of both compared lines was gradually reduced by the presence of 0.5, 1,  
491 1.5 and 3  $\text{mmol.l}^{-1}$   $\text{H}_2\text{O}_2$  (Figs. 5A-E) in the culture medium. We observed significantly  
492 longer roots of C24 wild-type plants than *der1-3* mutant plants within the testing period in  
493 control conditions, and on media containing 0.5 and 1  $\text{mmol.l}^{-1}$   $\text{H}_2\text{O}_2$ , however, there was no  
494 statistically significant difference in the root length on media containing 1.5  $\text{mmol.l}^{-1}$   $\text{H}_2\text{O}_2$   
495 (Fig. 5E). Interestingly, the stronger concentration of  $\text{H}_2\text{O}_2$  tested (1.5  $\text{mmol.l}^{-1}$ ) inhibited root  
496 elongation in C24 wild-type significantly more than in *der1-3* mutant plants (Fig. 5E).

497 Quantitative characterization of differences in averaged root growth rate presented as a  
498 reduction ratio between control and  $\text{H}_2\text{O}_2$ -containing media showed no differences between  
499 C24 wild-type and *der1-3* mutant on media containing 0.5 and 1  $\text{mmol.l}^{-1}$   $\text{H}_2\text{O}_2$  (Fig. 5F).  
500 However, moderate difference caused by 1.5  $\text{mmol.l}^{-1}$   $\text{H}_2\text{O}_2$  and considerably increased  
501 difference induced by 3  $\text{mmol.l}^{-1}$   $\text{H}_2\text{O}_2$  (Fig. 5F) suggested that root growth and development  
502 of *der1-3* mutant plants are substantially more resistant to moderate and severe oxidative  
503 stress than of C24 wild-type plants. It can be further documented also by phenotype of whole  
504 plants. Together with the root system that was severely reduced by increasing concentration  
505 of  $\text{H}_2\text{O}_2$  in C24 wild-type plants, reduction in the development of their above ground parts  
506 was also obvious (Suppl. Fig. S8A). In comparison, although the development of root system  
507 of *der1-3* mutant plants was also accordingly reduced by increasing concentration of  $\text{H}_2\text{O}_2$ ,  
508 development of their above ground parts was less affected (Suppl. Fig. S8B). The overall data



509 of phenotypical analyses thus indicate that *der1-3* mutant and transgenic plants in *der1-3*  
510 mutant background maintain growth and development because they are better protected  
511 against PQ- or H<sub>2</sub>O<sub>2</sub>-induced oxidative stress.

512

### 513 *Oxidative stress and response of the actin cytoskeleton*

514 In order to characterize organization and dynamic properties of actin cytoskeleton  
515 under PQ-induced oxidative stress, we utilized transgenic C24 and *der1-3* lines expressing  
516 *pro35S::GFP:FABD2* construct. In hypocotyl epidermal cells of 3 days-old plants of C24  
517 GFP-FABD2 line in control conditions, actin filaments were arranged in extensive, well  
518 organized and dynamic network (Suppl. Video 3). However, we observed massive bundling,  
519 particularly in cortical layers of the cell after treatment with 0.1 μmol.l<sup>-1</sup> PQ for 30 min (Fig.  
520 6A; Suppl. Video 4). Semi-quantitative evaluation of actin filament skewness, determining a  
521 degree of actin filaments bundling, showed increased levels after application of oxidative  
522 stress (Fig. 6B). Semi-quantitative evaluation of integrated density, determining fluorescence  
523 signal intensity per 1 μm<sup>2</sup>, was also significantly increased after PQ treatment (Fig. 6C). Actin  
524 filament organization was slightly different in hypocotyl epidermal cells of 3 days-old *der1-3*  
525 GFP-FABD2 plants in control conditions, showing mainly thinner, less organized, but  
526 dynamic actin filaments in cell cortex (Suppl. Video 5). Treatment with 0.1 μmol.l<sup>-1</sup> PQ for 30  
527 min induced partial bundling of actin filaments, but overall changes in their organization and  
528 dynamics were not so dramatic (Fig. 6D; Suppl. Video 6). As a result, both actin filament  
529 skewness, determining a degree of actin filaments bundling (Fig. 6E), and integrated density,  
530 determining mean fluorescence signal intensity (Fig. 6F), were not significantly affected by  
531 oxidative stress.

532 Next, dynamic properties of actin cytoskeleton in hypocotyl epidermal cells were  
533 analysed by sequential imaging of actin filaments within 30 min (by acquiring 0, 15 and 30  
534 min time-points), followed by pseudocolour-based evaluation of their lateral displacement. In  
535 control conditions, dynamic changes of actin filament network in cells of both C24 GFP-  
536 FABD2 (Fig. 6G; Suppl. Video 3) and *der1-3* GFP-FABD2 (Fig. 6I; Suppl. Video 5) lines  
537 were determined by minimal overlay of sequential coloured scans in merged images. After  
538 application of 0.1 μmol.l<sup>-1</sup> PQ the same analysis revealed formation of excessive actin bundles  
539 with minimal dynamic changes in structure and organization in cells of C24 GFP-FABD2 line  
540 (Fig. 6H; Suppl. Video 4), while much less bundles were formed in cells of *der1-3* GFP-  
541 FABD2 line. In addition, overlay of sequential coloured scans revealed unchanged dynamic

542 properties that was still high particularly in fine actin filaments (Fig. 6J; Suppl. Video 6). This  
543 analysis showing alterations in structure and dynamic properties of actin cytoskeleton in *der1-*  
544 *3* GFP-FABD2 line, that were not considerably affected by PQ treatment, may significantly  
545 support observed physiological resistance of *der1-3* mutant and related transgenic *der1-3*  
546 GFP-FABD2 line against oxidative stress.

547

#### 548 *ROS production, lipid peroxidation and antioxidant activity*

549 Relative levels of ROS were determined by the histochemical detection of their  
550 production in cotyledons and leaves of seedlings under control and oxidative stress-inducing  
551 conditions. Visualization was performed using NBT staining of  $O_2^{\bullet-}$  production and DAB  
552 staining of  $H_2O_2$  production, respectively. Semi-quantitative evaluation of the mean staining  
553 intensity revealed that both in cotyledons (Suppl. Fig. S9A) and leaves (Suppl. Fig. S9B) of  
554 plants treated for 7 days was no difference in  $O_2^{\bullet-}$  production upon PQ and  $H_2O_2$  treatments  
555 between C24 wild-type and *der1-3* mutant. The ability of  $H_2O_2$  production visualised by DAB  
556 staining was lower in *der1-3* mutant than in C24 wild-type in control conditions, both in  
557 cotyledons (Suppl. Fig. S9C) and leaves (Suppl. Fig. S9D). Interestingly, upon PQ and  $H_2O_2$   
558 treatments, the level of  $H_2O_2$  production in *der1-3* mutant was increased to the C24 wild-type  
559 level, both in cotyledons and leaves (Suppl. Fig. S9C, D).

560 Based on observed phenotypical differences, we aimed to provide an evidence about  
561 the biochemical mechanisms underlying an increased tolerance of *der1-3* mutant to oxidative  
562 stress. Our analyses showed that *der1-3* mutant exhibited lower degree of lipid peroxidation  
563 after long-term PQ treatment compared to C24 wild-type, while cultivation on  $H_2O_2$ -  
564 containing media did not cause lipid peroxidation in any examined line (Fig. 7A). This  
565 indicated that PQ treatment was less damaging to *der1-3* mutant as compared to C24 in terms  
566 of membrane integrity. Next, we also examined activities of important antioxidant enzymes in  
567 *der1-3* mutant and C24 wild-type. We have found elevated capacity to decompose superoxide  
568 in *der1-3* mutant, as manifested by more intensive activation of iron superoxide dismutase 1  
569 (FeSOD1) in these plants when exposed to both PQ and  $H_2O_2$ , as compared to C24 wild-type  
570 (Fig. 7B, C). Both treatments substantially decreased the activity of copper-zinc superoxide  
571 dismutase (CuZnSOD) isoforms in both *der1-3* mutant and C24 wild-type, while this  
572 reduction was less pronounced in *der1-3* mutant (Fig. 7B, C). This was observed also on  
573 protein abundance levels, as shown by immunoblotting (Fig. 7D, E). In addition, we

574 encountered also substantially increased abundance of chloroplastic PrxQ, a H<sub>2</sub>O<sub>2</sub>  
575 decomposing enzyme, in *der1-3* mutant in response to both PQ and H<sub>2</sub>O<sub>2</sub> treatments, while  
576 slight increase (in the case of PQ), or unchanged abundance (in the case of H<sub>2</sub>O<sub>2</sub>), were  
577 observed in C24 wild-type (Fig. 7F, G). Altogether, these results showed that increased  
578 tolerance of *der1-3* mutant plants to oxidative stress is determined by elevated enzymatic  
579 capacity to decompose reactive oxygen species.

580

## 581 **Discussion**

582 Random mutagenesis approach in *Arabidopsis thaliana* led to the isolation of *der1* mutants,  
583 bearing a single-point mutation in *ACTIN2* gene (Ringli *et al.*, 2002). It was demonstrated that  
584 these mutants (*der1-1*, *der1-2*, *der1-3*) are compromised in root hair development after the  
585 bulge initiation, showing typical “short root hair” phenotypes. Locations of these mutations to  
586 the *ACTIN2* gene confirmed essential role of actin cytoskeleton in the root hair development  
587 (Ringli *et al.*, 2002, 2005). Further phenotypical, developmental and microscopic analyses of  
588 *der1-3* mutant plants revealed that seeds of *der1-3* mutant germinated later than those of C24  
589 wild-type (Vaškebová *et al.*, 2018). Moreover, due to changes in the cell division plane  
590 orientation, primary roots showed irregular and wavy pattern while actin filaments in  
591 epidermal cells of different plant organs (roots, hypocotyls and cotyledons) were shorter,  
592 thinner and arranged in more random orientations in the *der1-3* mutant (Vaškebová *et al.*,  
593 2018). Thus, *der1-3* mutant was affected in broader range of morphological and  
594 developmental aspects, related to alterations of the actin cytoskeleton and its organization at  
595 cellular level. It is not clear how structural and dynamic properties of actin cytoskeleton may  
596 support plant reactions to oxidative stress, therefore we addressed this in the present study.  
597 We induced conditions of mild and severe oxidative stress by supplementing PQ or H<sub>2</sub>O<sub>2</sub> to  
598 the culture medium and characterized diverse parameters like germination, growth,  
599 development and biomass production in *der1-3* mutant and C24 wild-type plants. Analyses  
600 were done on plants germinating directly on such oxidative stress-inducing media or on  
601 seedlings germinated on control media first and subsequently transferred to PQ- or H<sub>2</sub>O<sub>2</sub>-  
602 containing plates.

603 Experiments on seed germination corroborated previously published data about  
604 slightly later germination of *der1-3* mutant (Vaškebová *et al.*, 2018). We found that oxidative  
605 stress induced by PQ in concentrations, which has clear negative effect on root growth, did  
606 not affect the processes of seed germination in both C24 plants and *der1-3* mutant.

607 Nevertheless, PQ in higher concentrations negatively affects seed germination (Haslekås *et*  
608 *al.*, 2003) indicating that processes connected to germination are more resistant to PQ  
609 compared to root growth. Next, we prepared transgenic lines of C24 and *der1-3* expressing  
610 *pro35S::GFP:FABD2* construct in order to perform live-cell microscopic characterization of  
611 actin cytoskeleton, its organization and dynamic properties in these lines. We also  
612 characterized root growth rate in all above-mentioned lines. Interestingly, root growth of both  
613 *der1-3* mutant and *der1-3* GFP-FABD2 transgenic line was much less affected by mild and  
614 severe PQ-induced oxidative stress as in control C24, particularly at concentration  $0.1 \mu\text{mol.l}^{-1}$   
615  $^1$  PQ in the culture medium. As a consequence, the reduction ratio in average root growth  
616 quantified as a fold change in respect to the C24 control was several orders lower in *der1-3*  
617 mutant (Fig. 2M, 3M, 5F). We found a similar tendency in the reduction of biomass  
618 production by PQ treatment, which was several orders stronger in C24 wild-type than in *der1-*  
619 *3* mutant. This trend was documented in both root and shoot biomass production and recorded  
620 in all PQ concentrations tested (Suppl. Fig. S5E, F, G). All data from analyses of post-  
621 germination root growth and plant development, both germinating on PQ-containing media  
622 and after transfer of non-treated seedlings to PQ-containing media, indicate that plants of  
623 *der1-3* mutant and *der1-3* GFP-FABD2 line are more tolerant, particularly to the mild  
624 oxidative stress.

625 Observed changes of phenotypical parameters distinguishing C24 wild-type from  
626 *der1-3* mutant indicate different sensitivity to oxidative stress. In addition, we performed  
627 several supporting biochemical experiments. Estimation of lipid peroxidation based on  
628 relative quantification of malondyaldehyde content revealed that *der1-3* mutant exhibits lower  
629 degree of lipid peroxidation after long-term PQ treatment compared to C24 wild-type. Thus,  
630 an important aspect of antioxidant defence in plants, namely membrane integrity, was better  
631 protected in *der1-3* mutant. Better tolerance of *der1-3* mutant against oxidative stress was  
632 supported also by abundance and activity of antioxidant enzymes such as iron superoxide  
633 dismutase 1 (FeSOD1) and two copper-zinc superoxide dismutase isoforms (CuZnSOD1 and  
634 CuZnSOD2). Elevated levels of FeSOD1 (activity) and CuZnSOD1/2 (activity and  
635 abundance) in *der1-3* mutant after long-term PQ and H<sub>2</sub>O<sub>2</sub> exposure point to higher capacity  
636 of the mutant to decompose superoxide radical compared to C24 wild-type. CuZnSOD1/2 and  
637 FeSOD1 are proposed as important determinants of oxidative stress tolerance (Sunkar *et al.*,  
638 2006; Dvořák *et al.*, 2020). *der1-3* mutants possess also increased H<sub>2</sub>O<sub>2</sub> decomposing  
639 efficiency which is executed by PrxQ. Nevertheless, other mechanisms of H<sub>2</sub>O<sub>2</sub> removal  
640 cannot be excluded. PrxQ is an atypical 2-cys peroxiredoxin which uses (and interacts with)

641 thioredoxin as an electron donor to decompose H<sub>2</sub>O<sub>2</sub> (Lamkemeyer *et al.*, 2006; Yoshida *et*  
642 *al.*, 2015). Peroxiredoxins and thioredoxins as redox buffering proteins, in addition, may  
643 modulate intracellular signalling related to ROS (Dietz *et al.*, 2006). Thus, we propose that  
644 higher capacity to decompose ROS and enhanced cellular redox regulation might be the main  
645 factors determining an increased tolerance of *der1-3* mutant to oxidative stress.

646 The next task was to reveal how structure and organization of actin cytoskeleton in  
647 *der1-3* may support increased tolerance of this mutant to oxidative stress. Previous study  
648 reported that *der1-3* mutant does not show solely root hair phenotype, but the actin  
649 cytoskeleton was altered and affected also root growth and development. Actin filaments in  
650 cells of *der1-3* mutant were shorter, thinner and arranged in more random orientations  
651 (Vaškebová *et al.*, 2018). Oxidative stress caused by application of 0.1 μmol.l<sup>-1</sup> PQ for 30 min  
652 induced massive bundling of actin filaments in cells of C24 GFP-FABD2 line. Actin  
653 cytoskeleton in cells of *der1-3* GFP-FABD2 line was arranged in extensive network, although  
654 actin filaments were thinner and less organized. However, this organization was virtually  
655 insensitive to 0.1 μmol.l<sup>-1</sup> PQ applied for 30 min. A higher protection of actin filaments fine  
656 network in *der1-3* GFP-FABD2 line was accompanied by roughly unchanged dynamic  
657 properties under PQ treatment. Thus, higher resistance of the actin cytoskeleton against  
658 deteriorating effects of oxidative stress may be one of the main molecular mechanism  
659 supporting the higher tolerance of *der1-3* mutant to this type of stress. This can be related to  
660 proposed role of actin cytoskeleton in adaptation of Arabidopsis root meristem cells to  
661 oxidative stress through protecting PIN2 auxin efflux carrier trafficking to the plasma  
662 membrane, which is controlled by auxin levels. Since auxin levels were disturbed by  
663 generated ROS, the abundance of PIN2 at the plasma membrane decreased. The role of actin  
664 cytoskeleton lies on keeping the PIN2 intracellular trafficking, which requires the function of  
665 the ADP-ribosylation factor (ARF)-guaninenucleotide exchange factor (GEF) BEN1, an  
666 actin-associated regulator (Zwiewka *et al.*, 2019). However, it is not known how this and  
667 similar functions can be affected by altered structural and dynamic properties of the actin  
668 cytoskeleton in *der1-3* mutant. It was proposed that PIN2 intracellular trafficking was reduced  
669 because H<sub>2</sub>O<sub>2</sub> treatment affected actin dynamics (Zwiewka *et al.*, 2019). Reduction in actin  
670 filament bundling can be directly associated with increased actin filament dynamics (Staiger  
671 and Blanchoin, 2006). Similarly, treatment of Arabidopsis plants with strigolactones reduces  
672 bundling of actin filaments with their simultaneously increasing dynamics, however, *der1-2*  
673 and *der1-3* mutants were much less sensitive to strigolactone analogue GR24 (Pandya-Kumar

674 *et al.*, 2014). Collectively, these data support our conclusion that actin filament arrangement  
675 less prone to bundling and staying dynamic is critical for actin properties in *der1-3* mutant,  
676 significantly contributing also to higher tolerance of this mutant against oxidative stress.

677 Position of the mutated amino acid in the ACTIN2 sequence, Arg-97, is located in the  
678 subdomain 1 on the protein surface (Fig. 1A; Suppl. Movie 1; Diet *et al.*, 2004; Kabsch *et al.*,  
679 1990; Ringli *et al.*, 2002). In mutated ACTIN2, *der1-3* mutation causes the single amino acid  
680 exchange of Arg by Cys, which is topologically exposed to the protein surface. Although it  
681 probably does not influence the protein tertiary structure, the topology of this modification  
682 might have strong impact on the post-translational modifications of ACTIN2, or its ability to  
683 perform protein-protein interactions in *der1-3* mutant. There are some supporting facts for  
684 this. BEN1, a guanine exchange factor for ARF, regulating actin filament-based intracellular  
685 trafficking of PIN2 during adaptation to oxidative stress, contains highly conserved cysteine  
686 residues (Mouratou *et al.*, 2005; Zwiewka *et al.*, 2019) that could be modified by H<sub>2</sub>O<sub>2</sub>  
687 treatment. Increased redox status upon accumulation of H<sub>2</sub>O<sub>2</sub> can initiate oxidation of  
688 cysteine sulfhydryl groups in actins (Wang *et al.*, 2012). As mutated ACTIN2 protein in *der1-*  
689 *3* mutant contains additional Cys compared to the native one, we hypothesize that ACTIN2 in  
690 *der1-3* might undergo redox-mediated posttranslational modifications accelerating, via PrxQ  
691 and thioredoxins, the antioxidant capacity in *der1-3* mutant.

692 Putting together, our data indicate that topologically important change in ACTIN2 in  
693 the *der1-3* mutant is linked to the better tolerance to mild and severe oxidative stress,  
694 increased capacity to decompose ROS and higher dynamicity of the actin cytoskeleton.

695

## 696 **Supplementary Information**

697 *Suppl. Fig. S1.* Seed germination under the PQ treatment of control C24, *der1-3* mutant and  
698 transgenic C24 and *der1-3* lines expressing *pro35S::GFP:FABD2*.

699 *Suppl. Fig. S2.* Impact of PQ treatment on root growth rate in control and transgenic C24 and  
700 *der1-3* mutant lines.

701 *Suppl. Fig. S3.* Effect of PQ treatment on the distance between the first root hair and the root  
702 tip in control and transgenic C24 and *der1-3* mutant lines.

703 *Suppl. Fig. S4.* Root growth rate in plants of control C24, *der1-3* mutant and transgenic C24  
704 and *der1-3* lines under prolonged PQ treatment.

705 *Suppl. Fig. S5.* Shoot and root fresh weight in plants of control C24, *der1-3* mutant and  
706 transgenic C24 and *der1-3* lines expressing *pro35S::GFP:FABD2* after germination and  
707 growth in PQ-containing media.

708 *Suppl. Fig. S6.* Root growth rate in control and transgenic C24 and *der1-3* mutant lines after  
709 their transfer to PQ-containing media

710 *Suppl. Fig. S7.* Plant phenotype of control and transgenic C24 and *der1-3* mutant lines on  
711 control media.

712 *Suppl. Fig. S8.* Phenotype of control C24 and *der1-3* mutant plants after their transfer to  
713 H<sub>2</sub>O<sub>2</sub>-containing media.

714 *Suppl. Fig. S9.* Histochemical detection of O<sub>2</sub><sup>•-</sup> and H<sub>2</sub>O<sub>2</sub> production in cotyledons and leaves  
715 of control C24 and *der1-3* mutant plants after their transfer to PQ- and H<sub>2</sub>O<sub>2</sub>-containing  
716 media.

717 *Suppl. Video 1.* 3D rotational model of protein structure of the nature ACTIN2 protein.

718 *Suppl. Video 2.* 3D rotational model of protein structure of mutated version in *der1-3* mutant.

719 *Suppl. Video 3.* Actin filaments in hypocotyl epidermal cells of C24 GFP-FABD2 line  
720 recorded in 30 seconds intervals for 30 min in control conditions.

721 *Suppl. Video 4.* Actin filaments in hypocotyl epidermal cells of C24 GFP-FABD2 line  
722 recorded in 30 seconds intervals after treatment with 0.1 μmol.l<sup>-1</sup> PQ for 30 min.

723 *Suppl. Video 5.* Actin filaments in hypocotyl epidermal cells of *der1-3* GFP-FABD2 line  
724 recorded in 30 seconds intervals for 30 min in control conditions.

725 *Suppl. Video 6.* Actin filaments in hypocotyl epidermal cells of *der1-3* GFP-FABD2 line  
726 recorded in 30 seconds intervals after treatment with 0.1 μmol.l<sup>-1</sup> PQ for 30 min.

727

## 728 **Acknowledgements**

729 The work was supported by Czech Science Foundation GAČR, project Nr. 19-18675S and by  
730 ERDF project "Plants as a tool for sustainable global development" (No.  
731 CZ.02.1.01/0.0/0.0/16\_019/0000827).

732

## 733 **Author contributions**

734 L.K. performed phenotypical and microscopic analyses, data processing and statistical  
735 evaluation. T.T. performed biochemical analyses. M.O. and L.K. wrote the manuscript with

736 input from all co-authors. M.O. and J.Š. conceived the study, designed the experiments and  
737 made final editing. J.Š. provided infrastructure, coordinated the whole project and supervised  
738 the work.

739

#### 740 **Data availability statement**

741 All data supporting the findings of this study are available within the paper and within its  
742 supplementary materials published online.

#### **References**

**Baluška F, Salaj J, Mathur J, Braun M, Jasper F, Šamaj J, Chua NH, Barlow PW, Volkmann D.** 2000. Root hair formation: F-actin-dependent tip growth is initiated by local assembly of profilin-supported F-actin meshworks accumulated within expansin-enriched bulges. *Developmental Biology* 227, 618–632.

**Baxter A, Mittler R, Suzuki N.** 2014. ROS as key players in plant stress signalling. *Journal of Experimental Botany* 65, 1229–1240.

**Beemster GTS, De Vusser K, De Tavernier E, De Bock K, Inze D.** 2002. Variation in growth rate between *Arabidopsis* ecotypes is correlated with cell division and A-type cyclin-dependent kinase activity1. *Plant physiology* 129, 854-864.

**Bus JS, Aust SD, Gibson JE.** 1974. Superoxide- and singlet oxygen-catalysed lipid peroxidation as a possible mechanism for paraquat (methyl viologen) toxicity. *Biochemical and Biophysical Research Communications* 58, 749–755.

**Clough SJ, Bent AF.** 1998. Floral dip: a simplified method for *Agrobacterium*-mediated transformation of *Arabidopsis thaliana*. *The Plant Journal* 16, 735-743.

**Dat J, Vandenabeele S, Vranová E, Van Montagu M, Inzé D, Breusegem F.** 2000. Dual action of the active oxygen species during plant stress responses. *Cellular and Molecular Life Science CMLS* 57, 779–795.

**Daudi A, Cheng Z, O'Brien JA, Mammarella N, Khan S, Ausubel FM, Bolwell GP.** 2012. The apoplastic oxidative burst peroxidase in *Arabidopsis* is a major component of pattern-triggered immunity. *Plant Cell* 24, 275–287.



- Desikan R, Reynolds A, Hancock JT, Neill SJ.** 1998. Harpin and hydrogen peroxide both initiate programmed cell death but have differential effects on defence gene expression in *Arabidopsis* suspension cultures. *Biochemical Journal* 330, 115-120.
- Diet A, Brunner S, Ringli C.** 2004. The *enl* mutants enhance the *lrx1* root hair mutant phenotype of *Arabidopsis thaliana*. *Plant and Cell Physiology* 45, 734–741.
- Dietz K-J, Jacob S, Oelze M-L, Laxa M, Tognetti V, Nunes de Miranda SM, Baier M, Finkemeier I.** 2006. The function of peroxiredoxins in plant organelle redox metabolism. *Journal of Experimental Botany* 57, 1697-1709.
- Douglas CJ.** 1996. Phenylpropanoid metabolism and lignin biosynthesis: from weeds to trees. *Trends in Plant Science* 1, 171-178.
- Dvořák P, Krasylenko Y, Ovečka M, Basheer J, Zapletalová V, Šamaj J, Takáč T.** 2020. *In vivo* light-sheet microscopy resolves localisation patterns of FSD1, a superoxide dismutase with function in root development and osmoprotection. *Plant, Cell & Environment in press*, doi:10.1111/pce.13894
- Farrington JA, Ebert M, Land EJ, Fletcher K.** 1973. Bipyridylum quaternary salts and related compounds. V. Pulse radiolysis studies of the reaction of paraquat radical with oxygen. Implications for the mode of action of bipyridyl herbicides. *Biochimica et Biophysica Acta (BBA) - Bioenergetics* 314, 372–381.
- Foyer CH, Noctor G.** 2013. Redox signaling in plants. *Antioxidants & Redox Signaling* 18, 2087–2090.
- Gilliland LU, Kandasamy MK, Pawloski LC, Meagher RB.** 2002. Both vegetative and reproductive actin isovariants complement the stunted root hair phenotype of the *Arabidopsis act2-1* mutation. *Plant Physiology* 130, 2199–2209.
- Han HJ, Peng RH, Zhu B, Fu XY, Zhao W, Shi B, Yao QH.** 2014. Gene expression profiles of *Arabidopsis* under the stress of methyl viologen: a microarray analysis. *Molecular Biology Reports* 41, 7089-7102.
- Haslekås C, Viken MK, Grini PE, Nygaard V, Nordgard SH, Meza TJ, Aalen RB.** 2003. Seed 1-Cysteine peroxiredoxin antioxidants are not involved in dormancy, but contribute to inhibition of germination during stress. *Plant Physiology* 133, 1148-1157.
- Hawkes TR.** 2014. Mechanisms of resistance to paraquat in plants. *Pest Management Science* 70, 1316–1323.
- Kabsch W, Mannherz HG, Suck D, Pai EF, Holmes KC.** 1990. Atomic structure of the actin: DNase-I complex. *Nature* 347, 37–44.

- Konig J, Muthuramalingam M, Dietz K-J.** 2012. Mechanisms and dynamics in the thiol/disulfide redox regulatory network: transmitters, sensors and targets. *Current Opinion in Plant Biology* 15, 261–268.
- Krieger-Liszkay A, Kós PB, Hideg E.** 2011. Superoxide anion radicals generated by methylviologen in photosystem I damage photosystem II. *Physiologia Plantarum* 142, 17-25.
- Kunert KJ, Dodge AD.** 1989. Herbicide-induced radical damage and antioxidative systems. In: Boger P, Sandmann G, eds. *Target Sites of Herbicide Action*, 1st ed., CRC Press, Florida, USA, 49-63.
- Lamkemeyer P, Laxa M, Collin V, et al.** 2006. Peroxiredoxin Q of *Arabidopsis thaliana* is attached to the thylakoids and functions in context of photosynthesis. *The Plant Journal* 45, 968-981.
- Larkindale J, Knight MR.** 2002. Protection against heat stress-induced oxidative damage in *Arabidopsis* involves calcium, abscisic acid, ethylene, and salicylic acid. *Plant Physiology* 128, 682–695.
- Levine A, Tenhaken R, Dixon R, Lamb C.** 1994. H<sub>2</sub>O<sub>2</sub> from the oxidative burst orchestrates the plant hypersensitive disease resistance response. *Cell* 79, 583–593.
- Liu SG, Zhu DZ, Chen GH, Gao X-Q, Zhang XS.** 2012. Disrupted actin dynamics trigger an increment in the reactive oxygen species levels in the *Arabidopsis* root under salt stress. *Plant Cell Reports* 31, 1219–1226.
- Mauch-Mani B, Slusarenko AJ.** 1996. Production of salicylic acid precursors is a major function of phenylalanine ammonia-lyase in the resistance of *Arabidopsis* to *Peronospora parasitica*. *Plant Cell* 8, 203-212.
- Maurino VG, Flügge U-I.** 2008. Experimental systems to assess the effects of reactive oxygen species in plant tissues. *Plant Signaling & Behavior* 3, 923-928.
- McDowell JM, Huang SR, McKinney EC, An YQ, Meagher RB.** 1996. Structure and evolution of the actin gene family in *Arabidopsis thaliana*. *Genetics* 142, 587–602.
- Meagher RB, McKinney EC, Vitale AV.** 1999. The evolution of new structures: clues from plant cytoskeletal genes. *Trends in Genetics* 15, 278–284.
- Mhamdi A, Van Breusegem F.** 2018. Reactive oxygen species in plant development. *Development* 145, dev164376.
- Mignolet-Spruyt L, Xu E, Idänheimo N, Hoerberichts FA, Mühlenbock P, Brosché M, Van Breusegem F, Kangasjärvi J.** 2016. Spreading the news: subcellular and organellar reactive oxygen species production and signalling. *Journal of Experimental Botany* 67, 3831–3844.

- Miller EW, Dickinson BC, Chang CJ.** 2010. Aquaporin-3 mediates hydrogen peroxide uptake to regulate downstream intracellular signaling. *Proceedings of the National Academy of Sciences of the United States of America* 107, 15681-15686.
- Mittler R, Vanderauwera S, Suzuki N, Miller G, Tognetti VB, Vandepoele K, Gollery M, Shulaev V, Van Breusegem F.** 2011. ROS signaling: the new wave? *Trends in Plant Science* 16, 1360-1385.
- Mittler R.** 2017. ROS are good. *Trends in Plant Science* 22, 11-19.
- Mouratou B, Biou V, Joubert A, Cohen J, Shields DJ, Geldner N, Jürgens G, Melançon P, Cherfils J.** 2005. The domain architecture of large guanine nucleotide exchange factors for the small GTP-binding protein Arf. *BMC Genomics* 6, 20.
- O'Brien IEW, Baguley BC, Murray BG, Morris BAM, Ferguson IB.** 1998. Early stages of the apoptotic pathway in plant cells are reversible. *The Plant Journal* 13, 803-814.
- Ovečka M, Lang I, Baluška F, Ismail A, Illeš P, Lichtscheidl IK.** 2005. Endocytosis and vesicle trafficking during tip growth of root hairs. *Protoplasma* 226, 39-54.
- Pallotta MA, Graham RD, Langridge P, Sparrow DHB, Barker SJ.** 2000. RFLP mapping of manganese efficiency in barley. *Theoretical and Applied Genetics* 101, 1100-1108.
- Pandya-Kumar N, Shema R, Kumar M, et al.** 2014. Strigolactone analog GR24 triggers changes in PIN2 polarity, vesicle trafficking and actin filament architecture. *New Phytologist* 202, 1184–1196.
- Park H-J, Miura Y, Kawakita K, Yoshioka H, Doke N.** 1998. Physiological mechanisms of a sub-systemic oxidative burst triggered by elicitor-induced local oxidative burst in potato tuber slices. *Plant & Cell Physiology* 39, 1218–1225.
- Pickett CB, Lu AYH.** 1989. Glutathione S-transferases: gene structure, regulation, and biological function. *Annual Review of Biochemistry* 58, 743-764.
- Ramel F, Sulmon C, Bogard M, Couée I, Gouesbet G.** 2009. Differential patterns of reactive oxygen species and antioxidative mechanisms during atrazine injury and sucrose-induced tolerance in *Arabidopsis thaliana* plantlets. *BMC Plant Biology* 9, 28.
- Rao MV, Davis KR.** 1999. Ozone-induced cell death occurs via two distinct mechanisms in *Arabidopsis*: the role of salicylic acid. *The Plant Journal* 17, 603–614.
- Riley D, Wilkinson W, Tucker BV.** 1976. Biological unavailability of bound paraquat residues in soil. In: Kaufamn D, Still GG, Paulson GD, Bandal SK, eds. *Bound and Conjugated Pesticide Residues*, American Chemical Society USA 29, 301-353.

- Ringli C, Baumberger N, Diet A, Frey B, Keller B.** 2002. ACTIN2 is essential for bulge site selection and tip growth during root hair development of *Arabidopsis*. *Plant Physiology* 129, 1464-1472.
- Ringli C, Baumberger N, Keller B.** 2005. The *Arabidopsis* root hair mutants *der2–der9* are affected at different stages of root hair development. *Plant and Cell Physiology* 46, 1046–1053.
- Staiger CJ, Blanchoin L.** 2006. Actin dynamics: old friends with new stories. *Current Opinion in Plant Biology* 9, 554–562.
- Sunkar R, Kapoor A, Zhu J-K.** 2006. Posttranscriptional induction of two Cu/Zn superoxide dismutase gene in *Arabidopsis* is mediated by downregulation of miR398 and important for oxidative stress tolerance. *The Plant Cell* 18, 2051-2065.
- Takáč T, Obert B, Rolčík J, Šamaj J.** 2016. Improvement of adventitious root formation in flax using hydrogen peroxide. *New Biotechnology* 33, 728-734.
- Takáč T, Šamajová O, Luptovčíak I, Pechan T, Šamaj J.** 2017. Feedback microtubule control and microtubule-actin cross-talk in *Arabidopsis* revealed by integrative proteomic and cell biology analysis of *KATANIN 1* mutants. *Molecular & Cellular Proteomics* 16, 1591-1609.
- Takáč T, Šamajová O, Vadovic P, Pechan T, Kosútová P, Ovečka M, Husicíková A, Komis G, Šamaj J.** 2014. Proteomic and biochemical analyses show a functional network of proteins involved in antioxidant defense of the *Arabidopsis anp2anp3* double mutant. *Journal of Proteome Research* 13, 5347–5361.
- Takeda S, Gapper C, Kaya H, Bell E, Kuchitsu K, Dolan L.** 2008. Local positive feedback regulation determines cell shape in root hair cells. *Science* 319, 1241–1244.
- Vaahtera L, Brosché M, Wrzaczek M, Kangasjärvi J.** 2014. Specificity in ROS signaling and transcript signatures. *Antioxidants & Redox Signaling* 21, 1422–1441.
- Vanderauwera S, Suzuki N, Miller G, et al.** 2011. Extranuclear protection of chromosomal DNA from oxidative stress. *Proceedings of the National Academy of Sciences of the United States of America* 108, 1711–1716.
- Vaškebová L, Šamaj J, Ovečka M.** 2018. Single-point *ACT2* gene mutation in the *Arabidopsis* root hair mutant *der1-3* affects overall actin organization, root growth and plant development. *Annals of Botany* 122, 889–901.
- Voigt B, Timmers ACJ, Šamaj J, Müller J, Baluška F, Menzel D.** 2005. GFP-FABD2 fusion construct allows in vivo visualization of the dynamic actin cytoskeleton in all cells of *Arabidopsis* seedlings. *European Journal of Cell Biology* 84, 595–608.

**Wallström SV, Aidemarka M, Escobar MA, Rasmusson AG.** 2012. An alternatively spliced domain of the NDC1 NAD(P)H dehydrogenase gene strongly influences the expression of the ACTIN2 reference gene in *Arabidopsis thaliana*. *Plant Science* 183, 190–196.

**Wang H, Wang S, Lu Y, Alvarez S, Hicks LM, Ge X, Xia Y.** 2012. Proteomic analysis of early-responsive redox-sensitive proteins in *Arabidopsis*. *Journal of Proteome Research* 11, 412–424.

**Wasteneys GO, Galway ME.** 2003. Remodeling the cytoskeleton for growth and form: An overview with some new views. *Annual Review of Plant Biology* 54, 691–722.

**Willekens H, Chamnongpol S, Davey M, et al.** 1997. Catalase is a sink for H<sub>2</sub>O<sub>2</sub> and is indispensable for stress defence in C3 plants. *The EMBO Journal* 16, 4806–4816.

**Xiong Y, Contento AL, Nguyen PQ, Bassham DC.** 2007. Degradation of oxidized proteins by autophagy during oxidative stress in *Arabidopsis*. *Plant Physiology* 143, 291–299.

**Yao N, Tada Y, Park P, Nakayashiki H, Tosa Y, Mayama S.** 2001. Novel evidence for apoptotic cell response and differential signals in chromatin condensation and DNA cleavage in victorin-treated oats. *The Plant Journal* 28, 13–26.

**Yoshida K, Hara S, Hisabori T.** 2015. Thioredoxin selectivity for thiol-based redox regulation of target proteins in chloroplasts. *The Journal of Biological Chemistry* 290, 14278–14288.

**Zhou Y, Yang Z, Guo G, Guo Y.** 2010. Microfilament dynamics is required for root growth under alkaline stress in *Arabidopsis*. *Journal of Integrative Plant Biology* 52, 952–958.

**Zwiewka M, Bielach A, Tamizhselvan P, et al.** 2019. Root adaptation to H<sub>2</sub>O<sub>2</sub>-induced oxidative stress by ARF-GEF BEN1- and cytoskeleton-mediated PIN2 trafficking. *Plant and Cell Physiology* 60, 255–273.

## Figure legends

**Figure 1. Model of the nature ACTIN2 protein structure and its mutated version in *der1-3* mutant.**

(A-B) SWISS model of the tertiary protein structure of ACTIN2 based on wild-type gene sequence (A) and based on gene sequence altered by single-point mutation in *der1-3* mutant (B). Topological location of arginine in the position 97 of natural ACTIN2 (A) and substituted cysteine in the position 97 of mutated ACTIN2 (B) of *der1-3* mutant are showed in boxes. (C-D) Detailed structure of spatial arrangements of Arg97 (C) and Cys97 (D) from

boxed area in (A) and (B), respectively. 3D rotational models of protein structures are presented in Suppl. Movies 1 and 2. Models of protein structures were produced in: <https://swissmodel.expasy.org/interactive?fbclid=IwAR1V9lhUgjiR1kUlWFLd8ojFftkHpkZwxIoT6mnEVIulEC2cPSYQov2twoE>.

**Figure 2. Root growth rate in plants of control C24, *der1-3* mutant and transgenic C24 and *der1-3* lines expressing *pro35S::GFP:FABD2* after germination in PQ-containing media.**

(A-D) Root growth rate within the first 5 days after germination of control C24 and *der1-3* mutant plants on control media (A) and on media containing 0.1 (B), 0.2 (C) and 0.5 (D)  $\mu\text{mol.l}^{-1}$  PQ. (E-H) Root growth rate within the first 5 days after germination of transgenic C24 line carrying GFP-FABD2 and transgenic *der1-3* line carrying GFP-FABD2 on control media (E) and on media containing 0.1 (F), 0.2 (G) and 0.5 (H)  $\mu\text{mol.l}^{-1}$  PQ. (I-L) Average root growth per 24 h on the control media (I) and on media containing 0.1 (J), 0.2 (K) and 0.5 (L)  $\mu\text{mol.l}^{-1}$  PQ. (M-O) Reduction ratio (fold change in respect to control) of averaged root growth in respective lines on media containing 0.1 (M), 0.2 (N) and 0.5 (O)  $\mu\text{mol.l}^{-1}$  PQ. Experiments were repeated two times with 16 plants per line (control) and 12 plants per line (PQ). Different lowercase letters above the bars (I-L) represent statistical significance according to one-way ANOVA and subsequent LSD test at p value < 0.05.

**Figure 3. Root growth rate in plants of control C24, *der1-3* mutant and transgenic C24 and *der1-3* lines expressing *pro35S::GFP:FABD2* after their transfer to PQ-containing media.**

Plants 3 days old germinated on control media were transferred to PQ-containing media and root growth rate was analysed within subsequent 4 days. (A-D) Root growth rate of control C24 and *der1-3* mutant plants on control media (A) and on media containing 0.1 (B), 0.2 (C) and 0.5 (D)  $\mu\text{mol.l}^{-1}$  PQ. (E-H) Root growth rate of transgenic C24 line carrying GFP-FABD2 and transgenic *der1-3* line carrying GFP-FABD2 on control media (E) and on media containing 0.1 (F), 0.2 (G) and 0.5 (H)  $\mu\text{mol.l}^{-1}$  PQ. (I-L) Average root growth per 24 h on the control media (I) and on media containing 0.1 (J), 0.2 (K) and 0.5 (L)  $\mu\text{mol.l}^{-1}$  PQ. (M-O) Reduction ratio (fold change in respect to control) of averaged root growth in respective lines

on media containing 0.1 (**M**), 0.2 (**N**) and 0.5 (**O**)  $\mu\text{mol.l}^{-1}$  PQ. Experiments were repeated two times with 16 plants per line (control) and 12 plants per line (PQ). Different lowercase letters above the bars (**I-L**) represent statistical significance according to one-way ANOVA and subsequent LSD test at p value < 0.05.

**Figure 4. Plant phenotype of control C24, *der1-3* mutant and transgenic C24 and *der1-3* lines expressing *pro35S::GFP:FABD2* after their transfer to PQ-containing media.**

Plants 3 days old germinated on control media were transferred to PQ-containing media and photographed 17 days after transfer. (**A-C**) Plants of control C24 and *der1-3* mutant growing on media containing 0.1 (**A**), 0.2 (**B**) and 0.5 (**C**)  $\mu\text{mol.l}^{-1}$  PQ. (**D-F**) Plants of transgenic C24 line carrying GFP-FABD2 and transgenic *der1-3* line carrying GFP-FABD2 growing on media containing 0.1 (**D**), 0.2 (**E**) and 0.5 (**F**)  $\mu\text{mol.l}^{-1}$  PQ. Aboveground parts of plants were photographed on white background (upper row of images), and whole plants including roots were documented on black background (lower row of images). Plants grown on control media are documented in Suppl. Figure S7. Scale bar = 1 cm.

**Figure 5. Root growth rate of control C24 and *der1-3* mutant plants after their transfer to  $\text{H}_2\text{O}_2$ -containing media.**

Plants 3 days old germinated on control media were transferred to  $\text{H}_2\text{O}_2$ -containing media and root growth rate was analysed within subsequent 4 days. (**A-D**) Root growth rate of control C24 and *der1-3* mutant plants on media containing 0.5 (**A**), 1 (**B**), 1.5 (**C**) and 3 (**D**)  $\text{mmol.l}^{-1}$   $\text{H}_2\text{O}_2$ . (**E**) Average root growth per 24 h on the control media (**I**) and on media containing indicated concentrations of  $\text{H}_2\text{O}_2$ . (**F**) Reduction ratio (fold change in respect to control) of averaged root growth in control C24 and *der1-3* mutant plants on media containing 0.5 (**A**), 1 (**B**), 1.5 (**C**) and 3 (**D**)  $\text{mmol.l}^{-1}$   $\text{H}_2\text{O}_2$ . Experiments were repeated two times with 10 plants per line. Different lowercase letters above the bars (**E**) represent statistical significance according to one-way ANOVA and subsequent LSD test at p value < 0.05.

**Figure 6. Organization and dynamics of actin filaments in hypocotyl epidermal cells of transgenic C24 and *der1-3* lines expressing *pro35S::GFP:FABD2* under PQ-induced oxidative stress.**

(A-C) Actin filaments in hypocotyl epidermal cells of 3 days-old plant of C24 GFP-FABD2 line in control conditions and after treatment with  $0.1 \mu\text{mol.l}^{-1}$  PQ for 30 min (A). Quantitative analysis of actin filaments bundling extent (skewness, B) and actin filaments density (percentage of occupancy, C) in control conditions and after application of  $0.1 \mu\text{mol.l}^{-1}$  PQ. (D-F) Actin filaments in hypocotyl epidermal cells of 3 days-old plant of *der1-3* GFP-FABD2 line in control conditions and after treatment with  $0.1 \mu\text{mol.l}^{-1}$  PQ for 30 min (D). Quantitative analysis of actin filaments bundling extent (skewness, E) and actin filaments density (percentage of occupancy, F) in control conditions and after application of  $0.1 \mu\text{mol.l}^{-1}$  PQ. Data were analysed on images collected from hypocotyl epidermal cells within 0, 15 and 30 min time-points of scanning. (G-J) Semiquantitative analysis of actin filament dynamics in hypocotyl epidermal cells presented by pseudocolouring displacement analysis. Dynamic properties of actin filaments in C24 GFP-FABD2 line in control conditions (G) and after application of  $0.1 \mu\text{mol.l}^{-1}$  PQ (H). Dynamic properties of actin filaments in *der1-3* GFP-FABD2 line in control conditions (I) and after application of  $0.1 \mu\text{mol.l}^{-1}$  PQ (J). Images acquired at the beginning, after 15 min and after 30 min of time-point scanning were coloured red, green, and blue, respectively, and merged. White colour indicates lowering (eventually stopping) of the actin dynamic activity. Experiments were repeated 5-6 times with 4-5 cells per plant in each line. Different lowercase letters above the bars (B, C, E, F) represent statistical significance according to one-way ANOVA and subsequent LSD test at  $p$  value  $< 0.05$ . Scale bar =  $10 \mu\text{m}$ .

**Figure 7. Estimation of lipid peroxidation and antioxidant capacity in plants of C24 wild-type and *der1-3* mutant.**

Plants 3 days old germinated on control media were transferred to  $0.1 \mu\text{mol.l}^{-1}$  PQ- and  $3 \text{mmol.l}^{-1}$   $\text{H}_2\text{O}_2$ -containing media. (A) Relative quantification of malondyaldehyde content. (B-C) Visualisation of superoxide dismutase (SOD) isoforms activity (B) and quantification of individual band densities (C) on native polyacrylamide gels. (D-E) Immunoblot of CuZnSOD1 and CuZnSOD2 isoforms (D) and quantification of band densities (E). (F-G) Immunoblot of peroxiredoxin Q abundance (F) and quantification of band densities (G). Different lowercase letters above the bars (A, C, E, G) represent statistical significance between treatments according to t-Test at  $p$  value  $< 0.05$ .



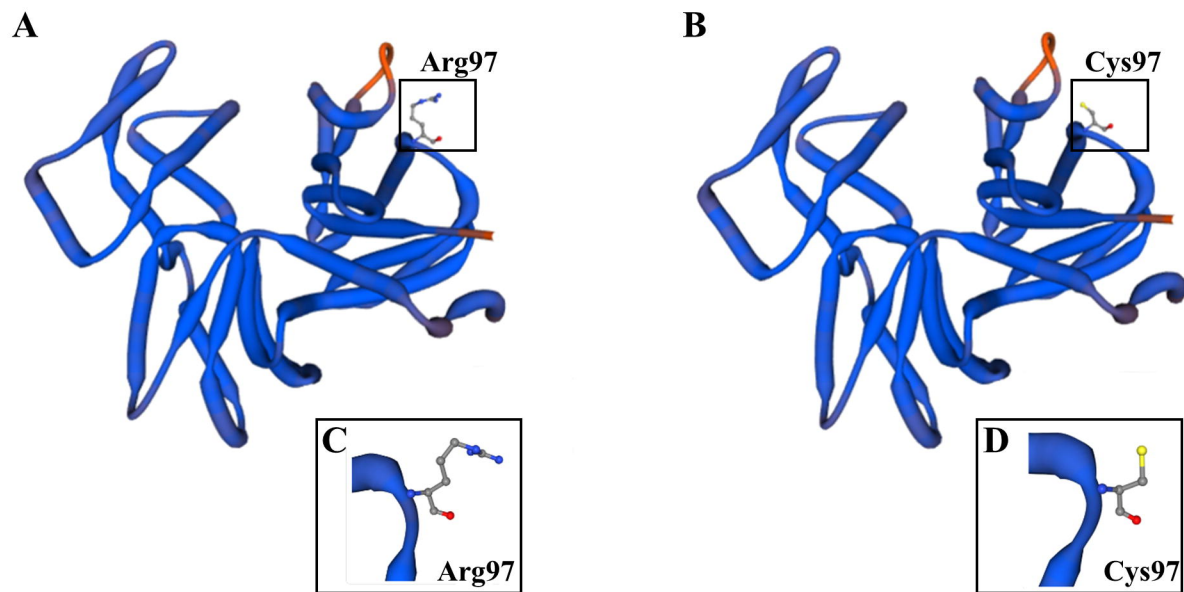

**Figure 1. Model of the nature ACTIN2 protein structure and its mutated version in *der1-3* mutant. (A-B)** SWISS model of the tertiary protein structure of ACTIN2 based on wild-type gene sequence (A) and based on gene sequence altered by single-point mutation in *der1-3* mutant (B). Topological location of arginine in the position 97 of natural ACTIN2 (A) and substituted cysteine in the position 97 of mutated ACTIN2 (B) of *der1-3* mutant are showed in boxes. (C-D) Detailed structure of spatial arrangements of Arg97 (C) and Cys97 (D) from boxed area in (A) and (B), respectively. 3D rotational models of protein structures are presented in Suppl. Movies 1 and 2. Models of protein structures were produced in:

<https://swissmodel.expasy.org/interactive?fbclid=IwAR1V9lhUgjiR1kUlWFLd8ojFftkHpkZwxIoT6mnEVIuIEC2cPSYQov2twoE>.

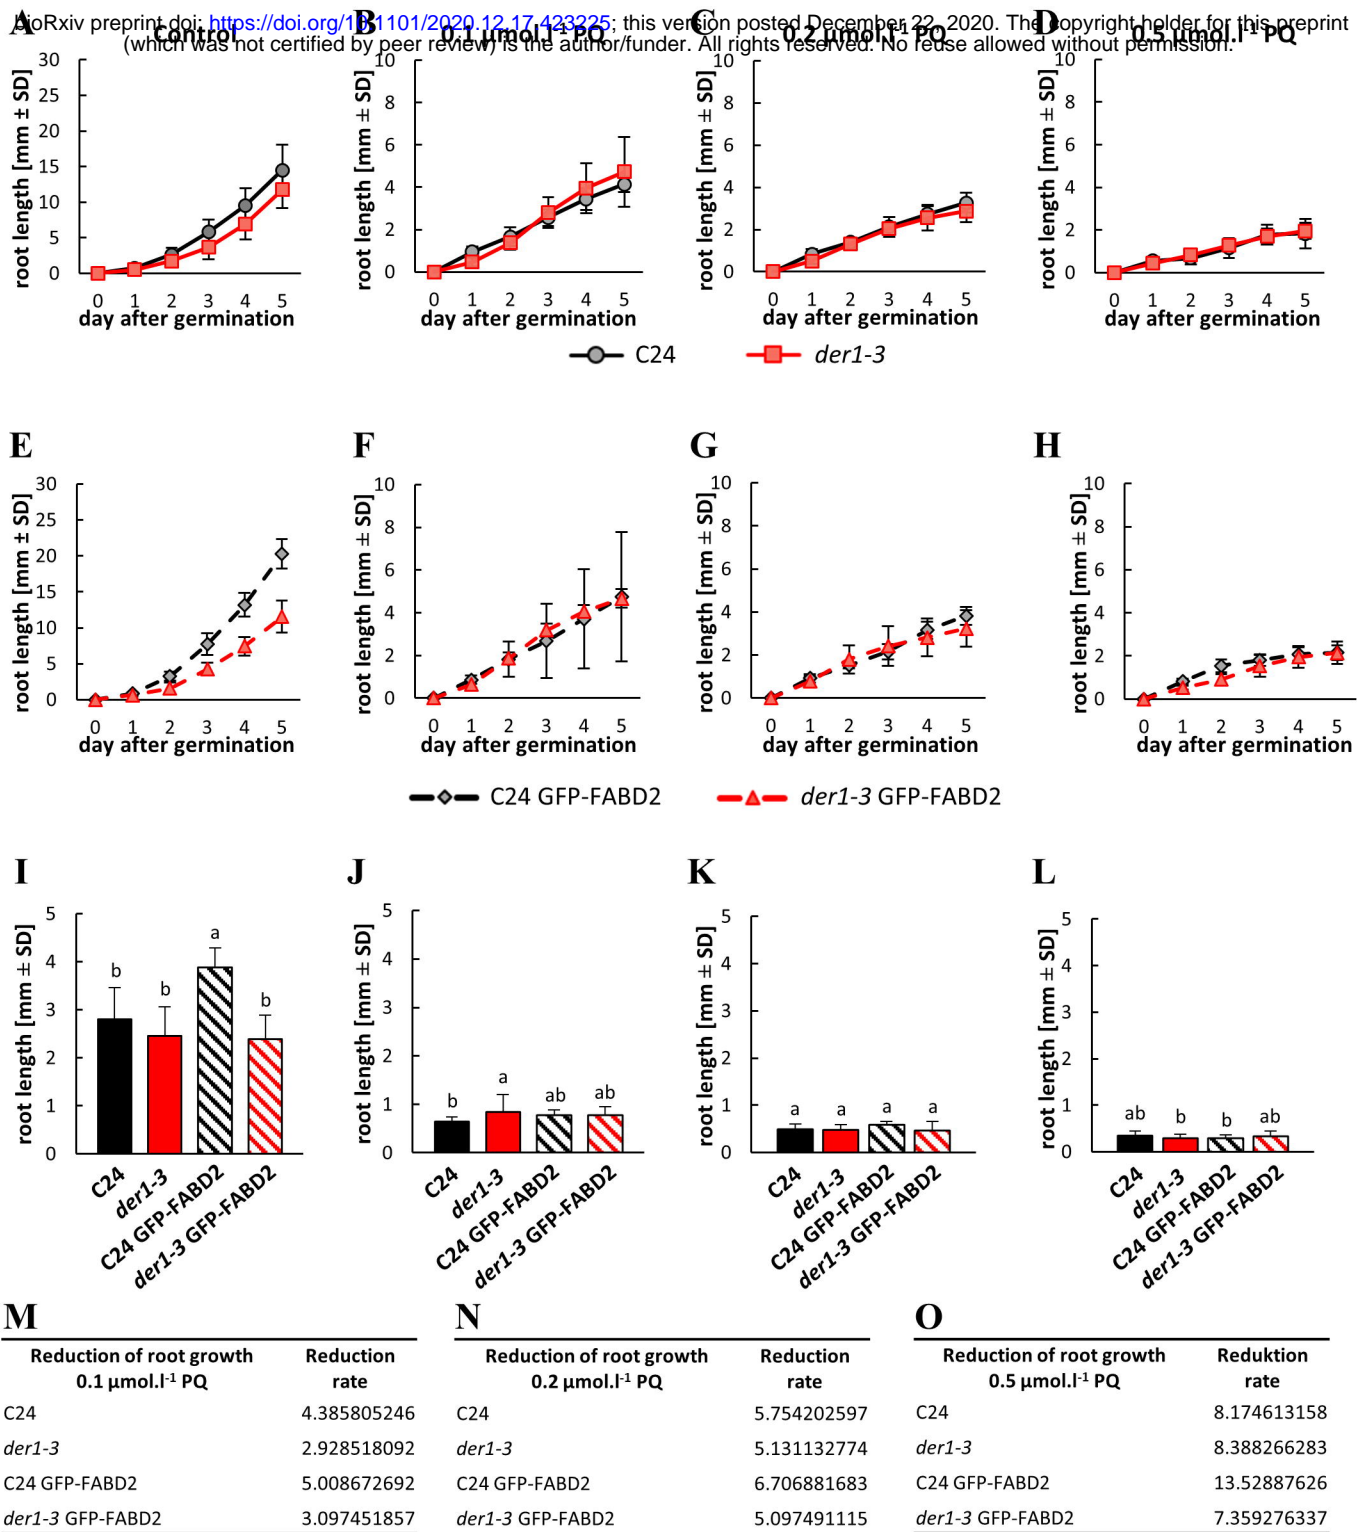

**Figure 2. Root growth rate in plants of control C24, *der1-3* mutant and transgenic C24 and *der1-3* lines expressing *pro35S::GFP:FABD2* after germination in PQ-containing media. (A-D) Root growth rate within the first 5 days after germination of control C24 and *der1-3* mutant plants on control media (A) and on media containing 0.1 (B), 0.2 (C) and 0.5 (D)  $\mu\text{mol.l}^{-1}$  PQ. (E-H) Root growth rate within the first 5 days after germination of transgenic C24 line carrying GFP-FABD2 and transgenic *der1-3* line carrying GFP-FABD2 on control media (E) and on media containing 0.1 (F), 0.2 (G) and 0.5 (H)  $\mu\text{mol.l}^{-1}$  PQ. (I-L) Average root growth per 24 h on the control media (I) and on media containing 0.1 (J), 0.2 (K) and 0.5 (L)  $\mu\text{mol.l}^{-1}$  PQ. (M-O) Reduction ratio (fold change in respect to control) of averaged root growth in respective lines on media containing 0.1 (M), 0.2 (N) and 0.5 (O)  $\mu\text{mol.l}^{-1}$  PQ. Experiments were repeated two times with 16 plants per line (control) and 12 plants per line (PQ). Different lowercase letters above the bars (I-L) represent statistical significance according to one-way ANOVA and subsequent LSD test at p value < 0.05.**

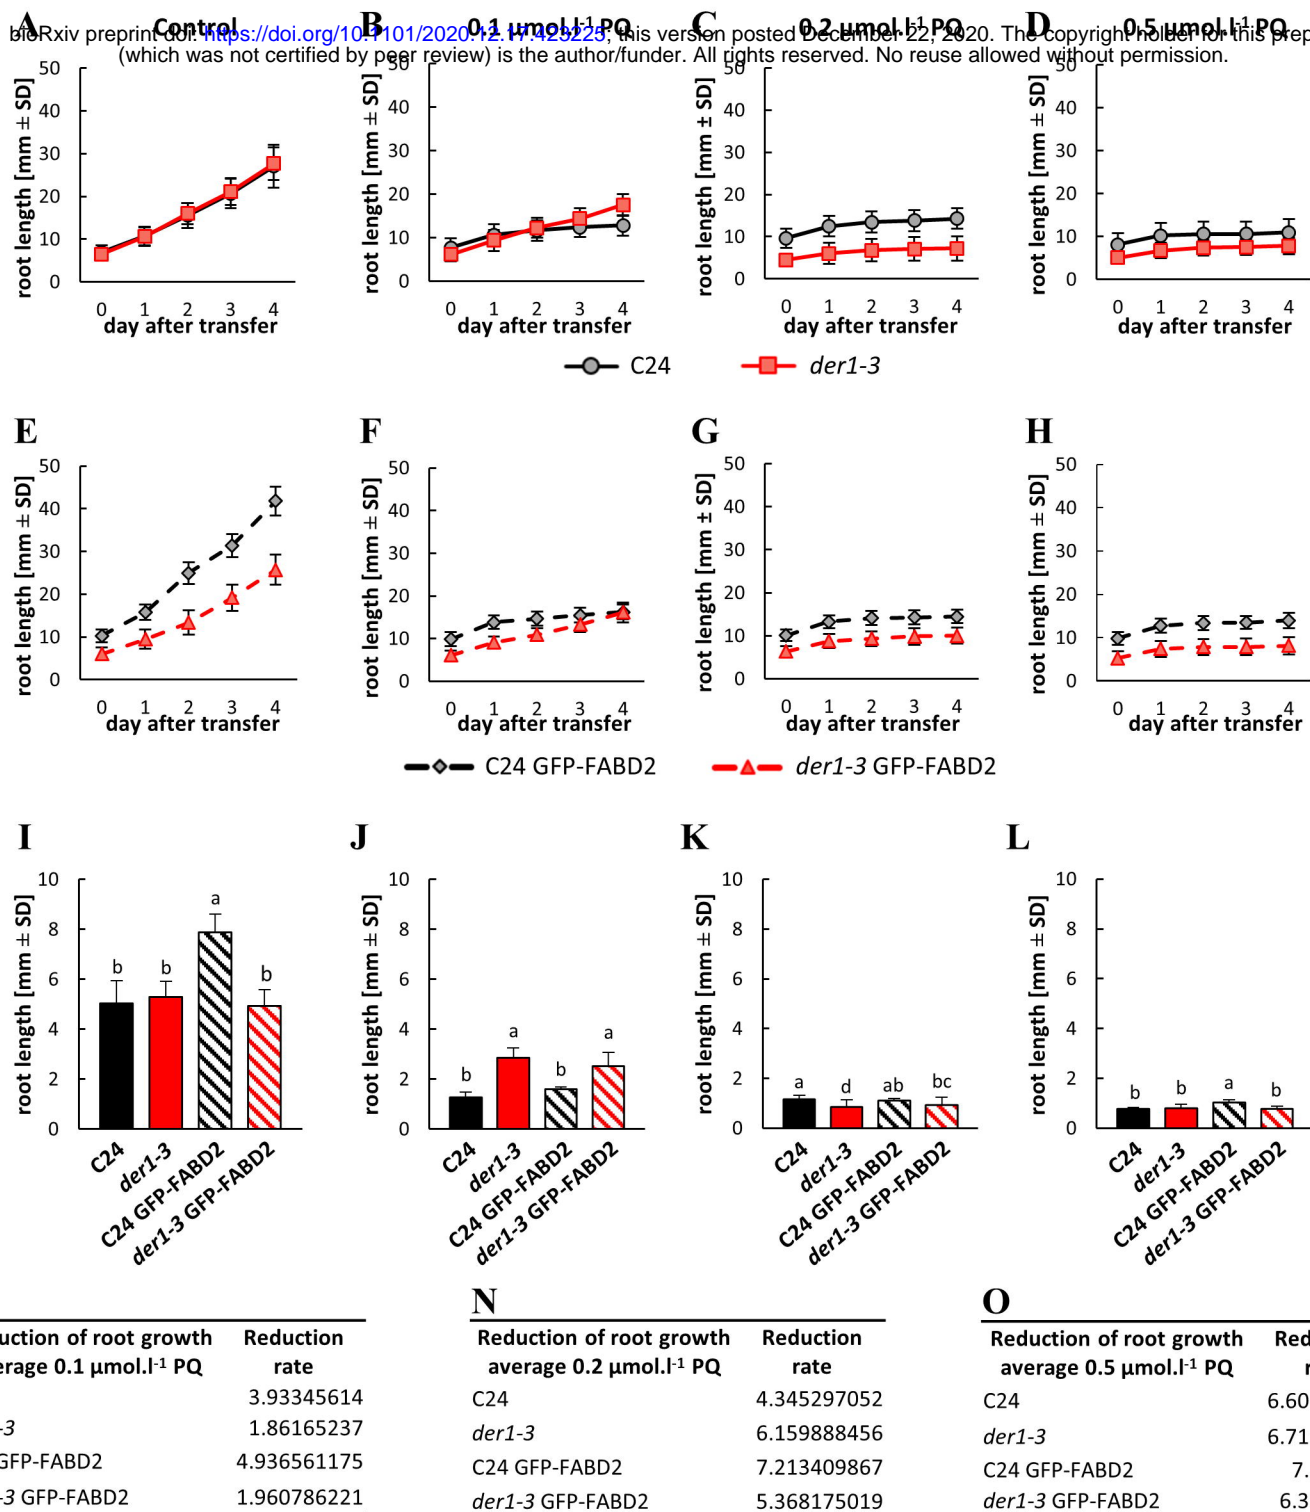

**Figure 3. Root growth rate in plants of control C24, *der1-3* mutant and transgenic C24 and *der1-3* lines expressing *pro35S::GFP:FABD2* after their transfer to PQ-containing media.** Plants 3 days old germinated on control media were transferred to PQ-containing media and root growth rate was analysed within subsequent 4 days. **(A-D)** Root growth rate of control C24 and *der1-3* mutant plants on control media **(A)** and on media containing 0.1 **(B)**, 0.2 **(C)** and 0.5 **(D)**  $\mu\text{mol.l}^{-1}$  PQ. **(E-H)** Root growth rate of transgenic C24 line carrying GFP-FABD2 and transgenic *der1-3* line carrying GFP-FABD2 on control media **(E)** and on media containing 0.1 **(F)**, 0.2 **(G)** and 0.5 **(H)**  $\mu\text{mol.l}^{-1}$  PQ. **(I-L)** Average root growth per 24 h on the control media **(I)** and on media containing 0.1 **(J)**, 0.2 **(K)** and 0.5 **(L)**  $\mu\text{mol.l}^{-1}$  PQ. **(M-O)** Reduction ratio (fold change in respect to control) of averaged root growth in respective lines on media containing 0.1 **(M)**, 0.2 **(N)** and 0.5 **(O)**  $\mu\text{mol.l}^{-1}$  PQ. Experiments were repeated two times with 16 plants per line (control) and 12 plants per line (PQ). Different lowercase letters above the bars **(I-L)** represent statistical significance according to one-way ANOVA and subsequent LSD test at p value < 0.05.

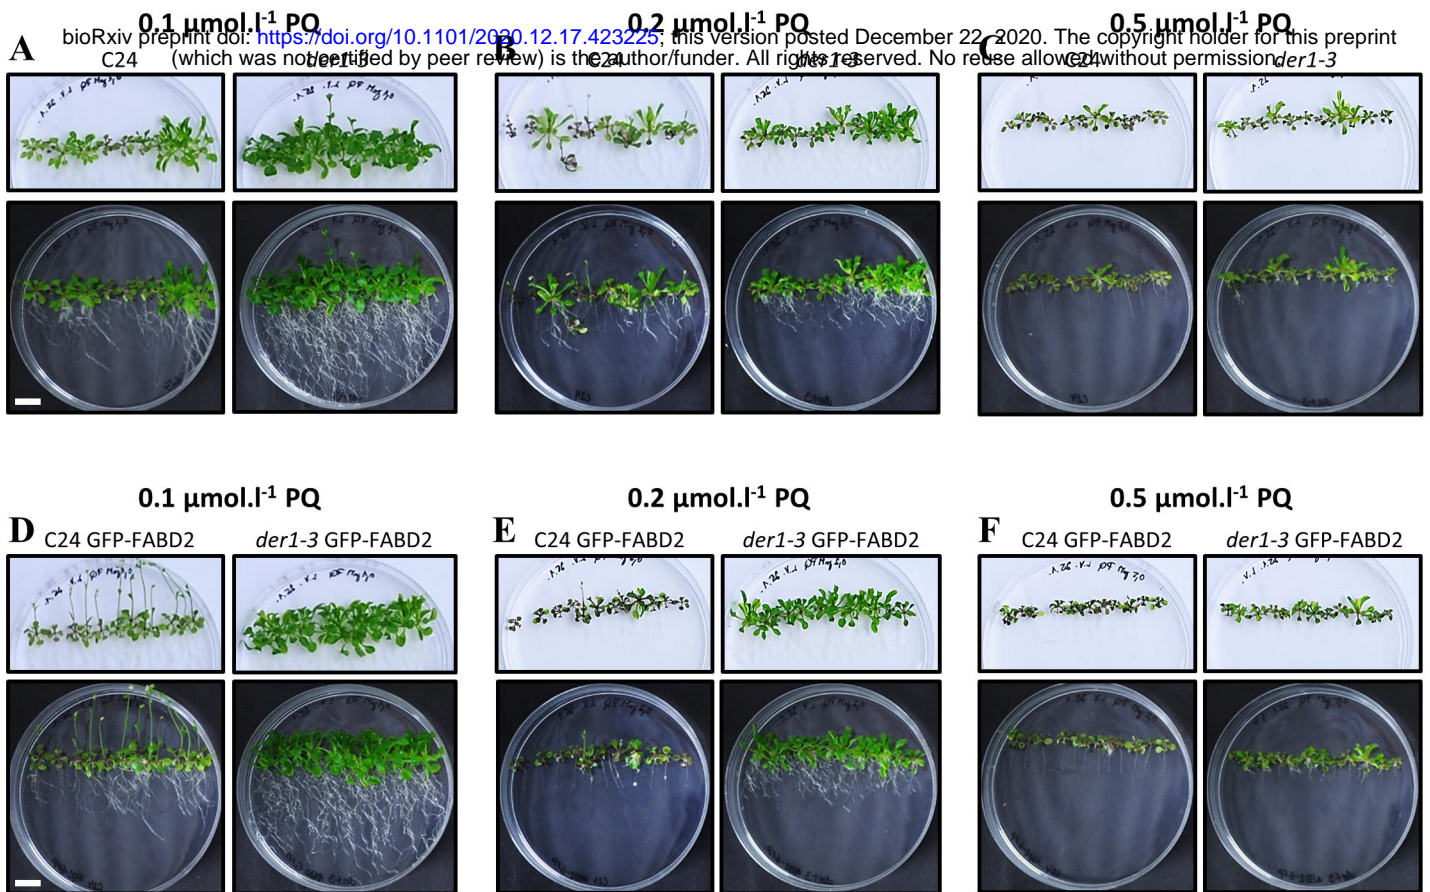

**Figure 4. Plant phenotype of control C24, *der1-3* mutant and transgenic C24 and *der1-3* lines expressing *pro35S::GFP:FABD2* after their transfer to PQ-containing media.** Plants 3 days old germinated on control media were transferred to PQ-containing media and photographed 17 days after transfer. **(A-C)** Plants of control C24 and *der1-3* mutant growing on media containing 0.1 **(A)**, 0.2 **(B)** and 0.5 **(C)**  $\mu\text{mol.l}^{-1}$  PQ. **(D-F)** Plants of transgenic C24 line carrying GFP-FABD2 and transgenic *der1-3* line carrying GFP-FABD2 growing on media containing 0.1 **(D)**, 0.2 **(E)** and 0.5 **(F)**  $\mu\text{mol.l}^{-1}$  PQ. Aboveground parts of plants were photographed on white background (upper row of images), and whole plants including roots were documented on black background (lower row of images). Plants grown on control media are documented in Suppl. Figure S8. Scale bar = 1 cm.

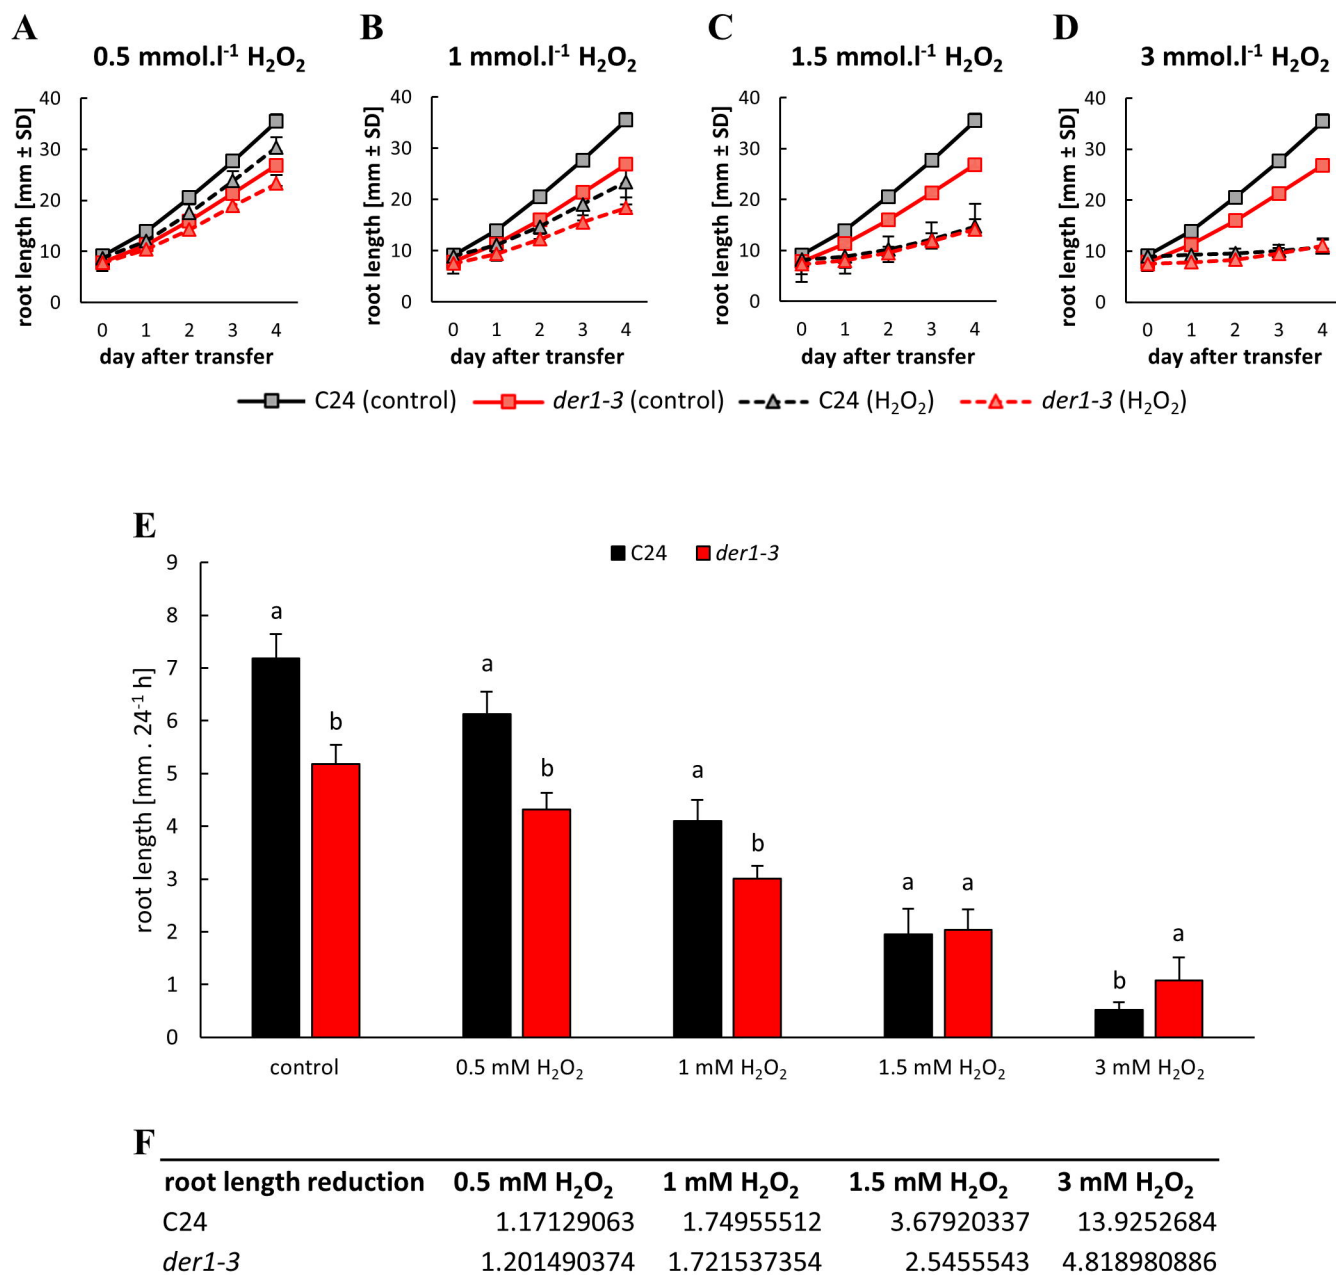

**Figure 5. Root growth rate of control C24 and *der1-3* mutant plants after their transfer to  $\text{H}_2\text{O}_2$ -containing media.** Plants 3 days old germinated on control media were transferred to  $\text{H}_2\text{O}_2$ -containing media and root growth rate was analysed within subsequent 4 days. (A-D) Root growth rate of control C24 and *der1-3* mutant plants on media containing 0.5 (A), 1 (B), 1.5 (C) and 3 (D)  $\text{mmol.l}^{-1} \text{ H}_2\text{O}_2$ . (E) Average root growth per 24 h on the control media (I) and on media containing indicated concentrations of  $\text{H}_2\text{O}_2$ . (F) Reduction ratio (fold change in respect to control) of averaged root growth in control C24 and *der1-3* mutant plants on media containing 0.5 (A), 1 (B), 1.5 (C) and 3 (D)  $\text{mmol.l}^{-1} \text{ H}_2\text{O}_2$ . Experiments were repeated two times with 10 plants per line. Different lowercase letters above the bars (E) represent statistical significance according to one-way ANOVA and subsequent LSD test at p value < 0.05.

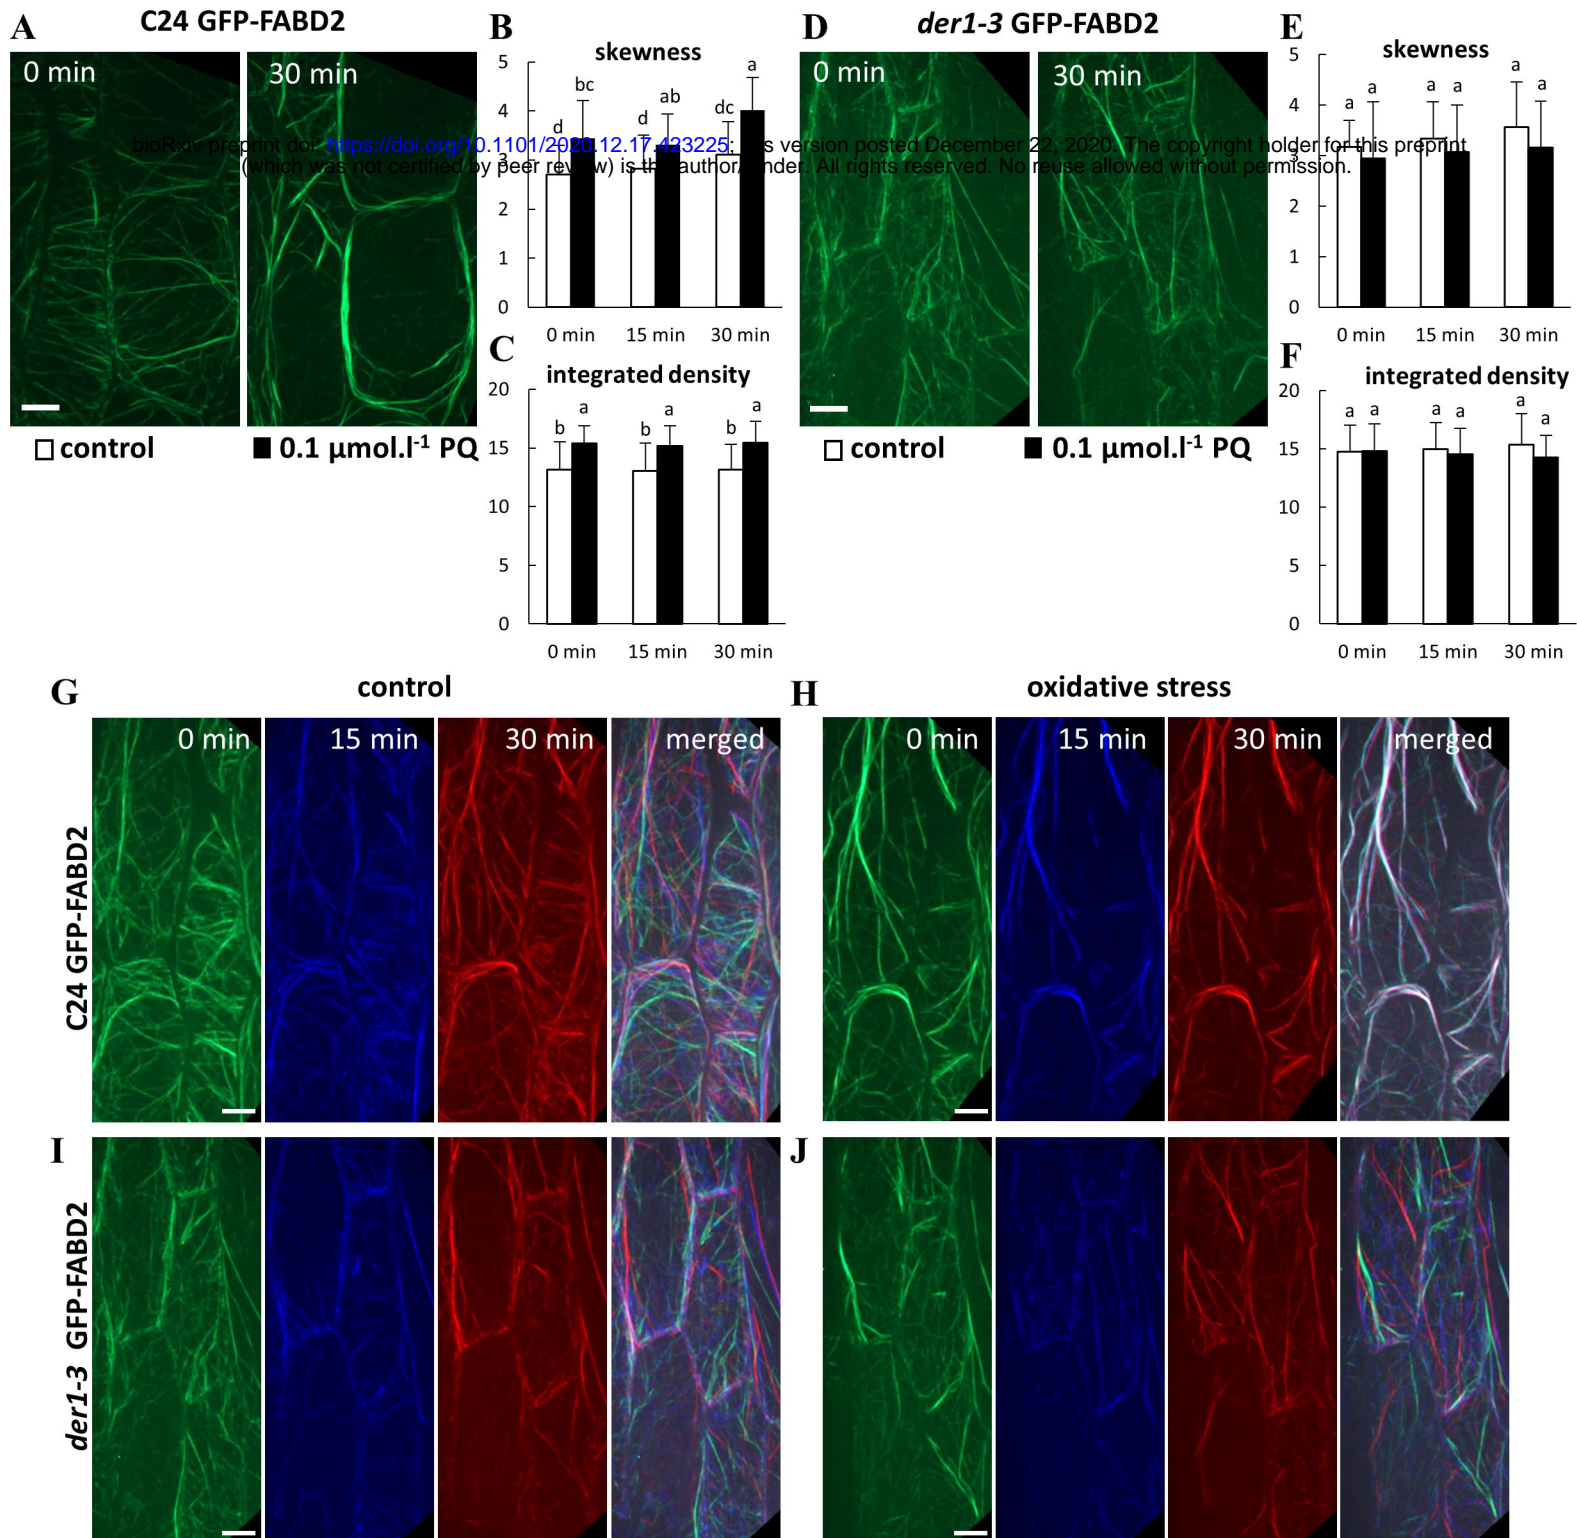

**Figure 6. Organization and dynamics of actin filaments in hypocotyl epidermal cells of transgenic C24 and *der1-3* lines expressing *pro35S::GFP:FABD2* under PQ-induced oxidative stress.** (A-C) Actin filaments in hypocotyl epidermal cells of 3 days-old plant of C24 GFP-FABD2 line in control conditions and after treatment with 0.1  $\mu\text{mol.l}^{-1}$  PQ for 30 min (A). Quantitative analysis of actin filaments bundling extent (skewness, B) and actin filaments density (percentage of occupancy, C) in control conditions and after application of 0.1  $\mu\text{mol.l}^{-1}$  PQ. (D-F) Actin filaments in hypocotyl epidermal cells of 3 days-old plant of *der1-3* GFP-FABD2 line in control conditions and after treatment with 0.1  $\mu\text{mol.l}^{-1}$  PQ for 30 min (D). Quantitative analysis of actin filaments bundling extent (skewness, E) and actin filaments density (percentage of occupancy, F) in control conditions and after application of 0.1  $\mu\text{mol.l}^{-1}$  PQ. Data were analysed on images collected from hypocotyl epidermal cells within 0, 15 and 30 min time-points of scanning. (G-J) Semiquantitative analysis of actin filament dynamics in hypocotyl epidermal cells presented by pseudocolouring displacement analysis. Dynamic properties of actin filaments in C24 GFP-FABD2 line in control conditions (G) and after application of 0.1  $\mu\text{mol.l}^{-1}$  PQ (H). Dynamic properties of actin filaments in *der1-3* GFP-FABD2 line in control conditions (I) and after application of 0.1  $\mu\text{mol.l}^{-1}$  PQ (J). Images acquired at the beginning, after 15 min and after 30 min of time-point scanning were coloured red, green, and blue, respectively, and merged. White colour indicates lowering (eventually stopping) of the actin dynamic activity. Experiments were repeated 5-6 times with 4-5 cells per plant in each line. Different lowercase letters above the bars (B, C, E, F) represent statistical significance according to one-way ANOVA and subsequent LSD test at  $p$  value  $< 0.05$ . Scale bar = 10  $\mu\text{m}$ .

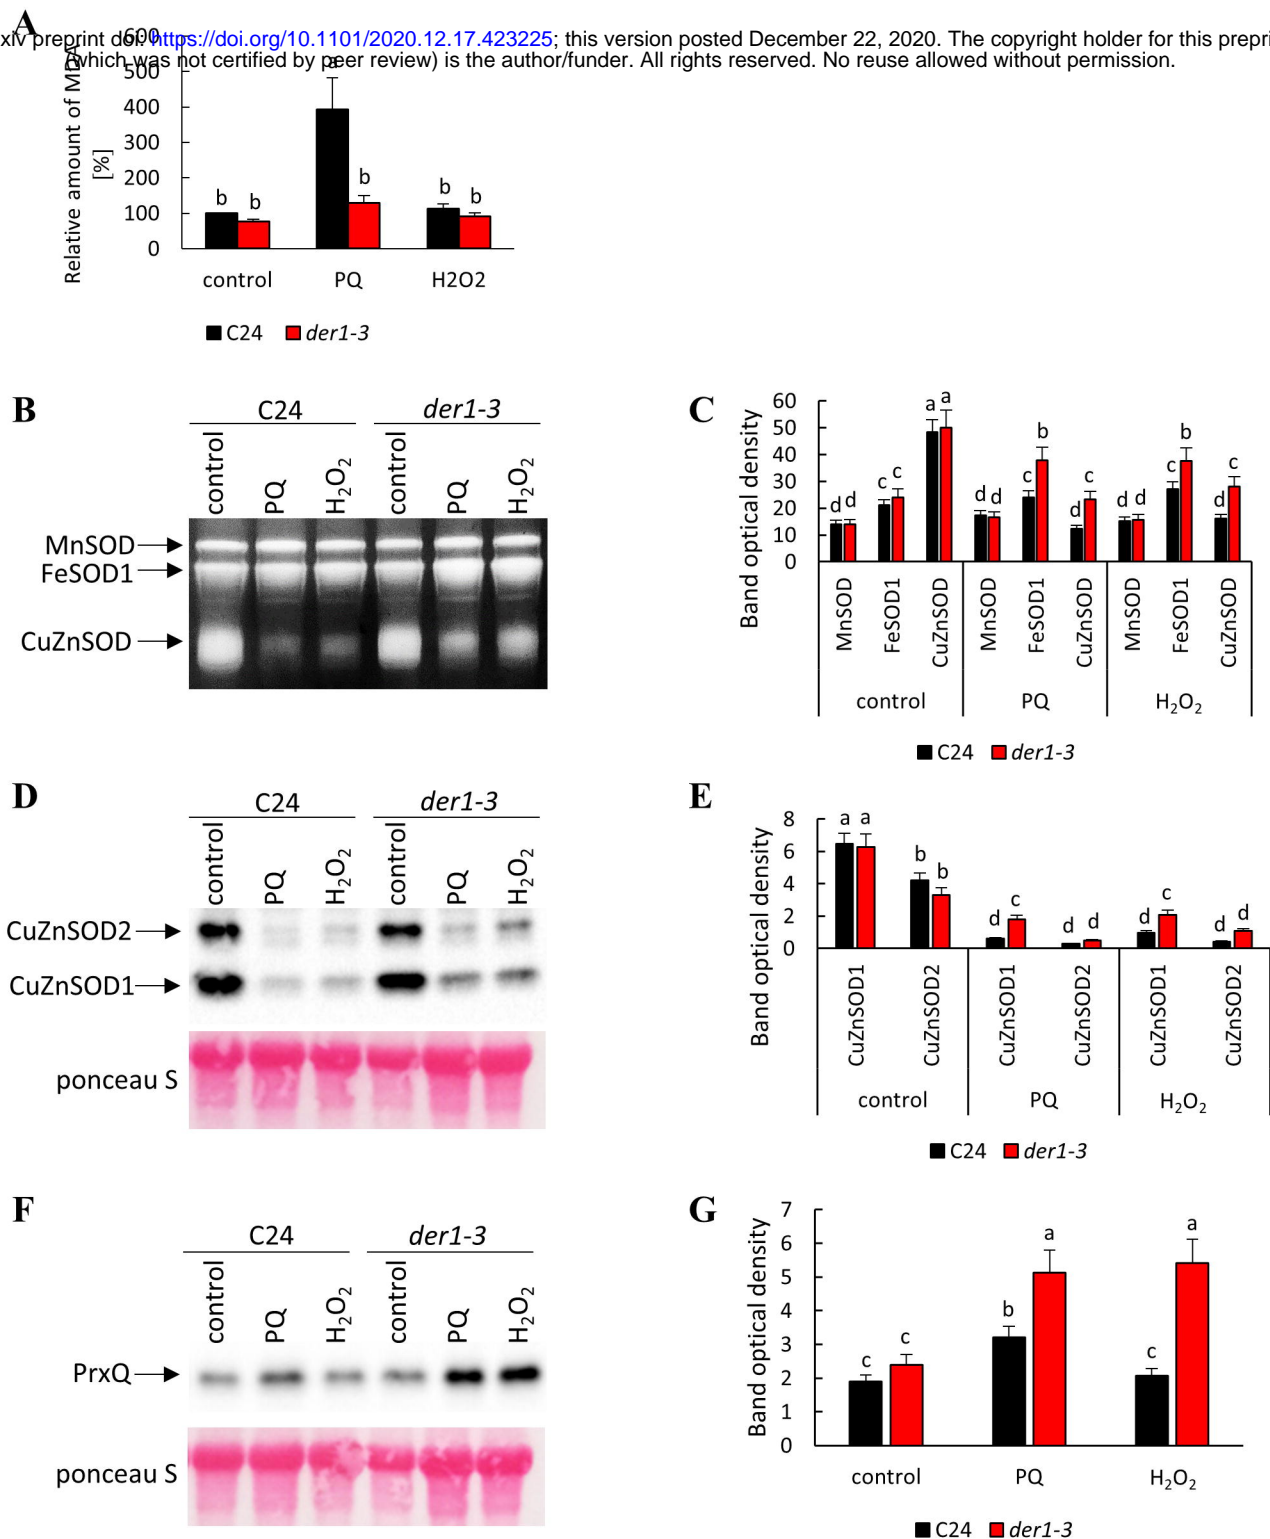

**Figure 7. Estimation of lipid peroxidation and antioxidant capacity in plants of C24 wild-type and *der1-3* mutant.** Plants 3 days old germinated on control media were transferred to 0.1  $\mu\text{mol.l}^{-1}$  PQ- and 3  $\text{mmol.l}^{-1}$  H<sub>2</sub>O<sub>2</sub>-containing media. (A) Relative quantification of malondialdehyde content. (B-C) Visualisation of superoxide dismutase (SOD) isoforms activity (B) and quantification of individual band densities (C) on native polyacrylamide gels. (D-E) Immunoblot of CuZnSOD1 and CuZnSOD2 isoforms (D) and quantification of band densities (E). (F-G) Immunoblot of peroxiredoxin Q abundance (F) and quantification of band densities (G). Different lowercase letters above the bars (A, C, E, G) represent statistical significance between treatments according to t-Test at  $p$  value < 0.05.
